# Supplementary material
Source: PubMed Central journal article supplement (PMC8893036)
Supplement: NIHMS1780701-supplement-1.pdf [file NIHMS1780701-supplement-1.pdf]

## Supporting Information

### Interaction of A<sub>3</sub> Adenosine Receptor Ligands with the Human Multidrug Transporter ABCG2

Biebele Abel,<sup>1#</sup> Megumi Murakami,<sup>1#</sup> Dilip K. Tosh,<sup>2#</sup> Jinha Yu,<sup>2</sup> Sabrina Lusvarghi,<sup>1</sup> Ryan G. Campbell,<sup>2</sup> Zhan-Guo Gao,<sup>2</sup> Kenneth A. Jacobson,<sup>2</sup> Suresh V. Ambudkar<sup>1</sup>

<sup>1</sup>*Laboratory of Cell Biology, Center for Cancer Research, National Cancer Institute (BA, MM, SL, SVA) and*

<sup>2</sup>*Molecular Recognition Section, Laboratory of Bioorganic Chemistry, National Institute of Diabetes and Digestive and Kidney Diseases (DKT, JY, RGC, ZGG, KAJ), National Institutes of Health, Bethesda, MD 20892, USA*

#These authors contributed equally

| <u>Contents</u>                                                                               | <u>Pages</u> |
|-----------------------------------------------------------------------------------------------|--------------|
| Tables S1 – S4. Receptor affinity of nucleosides and nucleobases                              | S2 – S13     |
| Off-target screening by PDSP                                                                  | S13          |
| References for Tables S1 – S4                                                                 | S14          |
| Scheme S1. Synthesis of 7-deazaadenines                                                       | S15          |
| Chemical synthesis                                                                            | S15 – S22    |
| Figure S1. Effects of <b>16</b> (A), <b>31</b> (B), and <b>4</b> (C) on ABCG2 ATPase activity | S23          |
| NMR and HPLC results for representative newly prepared compounds                              | S24 – S41    |

**TABLE S1**

A<sub>3</sub>AR, KOR ( $\kappa$ -opioid) and translocator protein (TSPO) affinity of *N*<sup>6</sup> and C2-phenylethynyl modifications of (N)-methanocarpa 2-arylethynyl-purine derivatives (5'-amides and 5'-alcohols).<sup>a</sup> References are listed on p. S14.

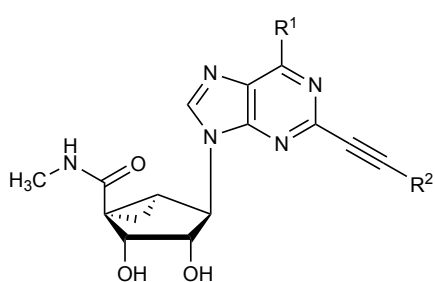**5 – 11, 13 – 15**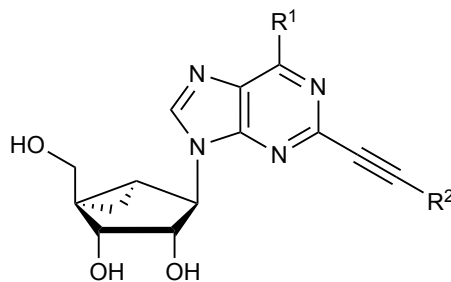**12**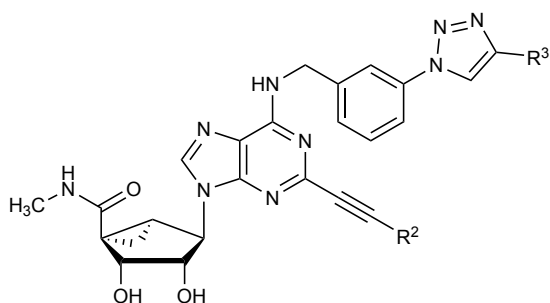**16 – 21**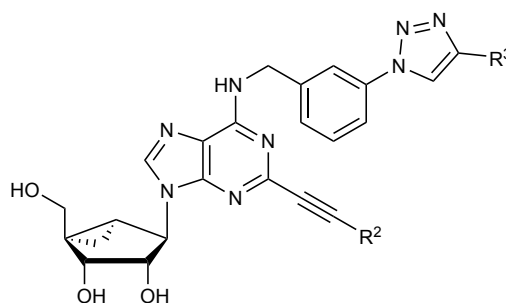**22, 23**

| No.                                          | R <sup>1</sup> or R <sup>3</sup> | R <sup>2</sup> | (K <sub>i</sub> , nM),<br>h, unless noted |                  | Compound<br>In reference | Reference |
|----------------------------------------------|----------------------------------|----------------|-------------------------------------------|------------------|--------------------------|-----------|
|                                              |                                  |                | A <sub>3</sub> AR                         | KOR<br>(TSPO)    |                          |           |
| <i>6-Benzylamino and 6-Alkyl derivatives</i> |                                  |                |                                           |                  |                          |           |
| <b>5</b><br><b>MRS</b><br><b>5698</b>        |                                  |                | 3.49 (h),<br>3.08 (m)                     | >10,000<br>(340) | 31                       | 1         |
| <b>6</b><br><b>MRS</b><br><b>7202</b>        | H                                |                | 124 (h)                                   | ND               | 20                       | 4         |

|                                             |                                                                                     |                                                                                     |                       |                       |    |          |
|---------------------------------------------|-------------------------------------------------------------------------------------|-------------------------------------------------------------------------------------|-----------------------|-----------------------|----|----------|
| <b>7</b><br><b>MRS</b><br><b>7196</b>       |    |    | 98.5 (h)              | ND                    | 16 | 4        |
| <b>8</b><br><b>MRS</b><br><b>5655</b>       |    |    | 1.34 (h),<br>1.23 (m) | >10,000<br>(2650±210) | 27 | 1        |
| <b>9</b><br><b>MRS</b><br><b>5678</b>       |    |    | 2.16 (h),<br>2.38 (m) | >10,000<br>(2530)     | 28 | 1        |
| <b>10</b><br><b>MRS</b><br><b>5697</b>      |    |    | 1.92 (h),<br>2.64 (m) | >10,000<br>(344)      | 29 | 1        |
| <b>11</b><br><b>MRS</b><br><b>7328</b>      |    |    | 2.60±0.83             | ND                    | 7  | 7        |
| <b>12</b><br><b>MRS</b><br><b>7779</b>      |   |   | 129                   | ND                    | -  | New here |
| <i>6-Phenylcyclopropylamino derivatives</i> |                                                                                     |                                                                                     |                       |                       |    |          |
| <b>13</b><br><b>MRS</b><br><b>5627</b>      |  |  | 20.2                  | ND                    | 15 | 2        |
| <b>14</b><br><b>MRS</b><br><b>7030</b>      |  |  | 16.9                  | ND                    | 16 | 2        |
| <b>15</b><br><b>MRS</b><br><b>7034</b>      |  |  | 4.55                  | ND                    | 17 | 2        |

| Triazole-extended 6-Benzylamino derivatives |                                                                                     |                                                                                     |           |                       |   |          |
|---------------------------------------------|-------------------------------------------------------------------------------------|-------------------------------------------------------------------------------------|-----------|-----------------------|---|----------|
| <b>16<sup>b</sup></b><br><b>MRS 7769</b>    | 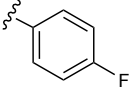   |    | 45.7      | >10,000<br>(3450±800) | - | New here |
| <b>17</b><br><b>MRS 7323</b>                |    |    | 5.23±0.45 | ND                    | 8 | 7        |
| <b>18<sup>b</sup></b><br><b>MRS 7767</b>    |    |    | 16.8      | >10,000<br>(3450±800) | - | New here |
| <b>19<sup>b</sup></b><br><b>MRS 7768</b>    |    |    | 23.5      | >10,000<br>(2220±200) | - | New here |
| <b>20<sup>b</sup></b><br><b>MRS 7778</b>    |   |    | 126       | >10,000<br>(1560±320) | - | New here |
| <b>21<sup>b</sup></b><br><b>MRS 7770</b>    |  |  | 106       | >10,000<br>(>10,000)  | - | New here |
| <b>22</b><br><b>MRS 7780</b>                |  |  | 596       | ND                    | - | New here |
| <b>23</b><br><b>MRS 7781</b>                |  |  | 1100      | ND                    | - | New here |

<sup>a</sup> The binding affinity for human (h) or mouse (m) A<sub>3</sub>AR (expressed in CHO cells) as a K<sub>i</sub> values using agonist [<sup>125</sup>I]N<sup>6</sup>-(4-amino-3-iodobenzyl)adenosine-5'-N-methyluronamide. A percent refers to inhibition of binding at 10 μM. See reference provided for more detail. ND, not determined.

<sup>b</sup> The binding affinity (μM) at s<sub>2</sub> receptor: **16**, 6.1; **18**, 4.3; **19**, 4.4; **20**, 4.1; **21**, >10. The binding affinity (μM) at b<sub>3</sub> receptor: **18**, 3.9.

**TABLE S2**

A<sub>3</sub>AR, KOR ( $\kappa$ -opioid) and translocator protein (TSPO) affinity of *N*<sup>6</sup>, C2 and riboside modifications of adenosine derivatives (both (N)-methanocarba and ribose-containing).<sup>a</sup> References are listed on p. S14.

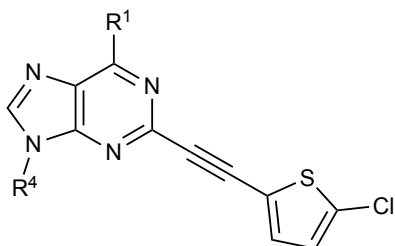**24 – 27**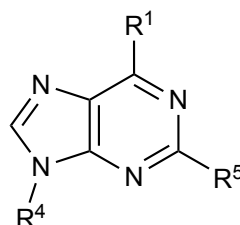**28 – 34**

| No.                                    | R <sup>1</sup>                                    | R <sup>4</sup> [R <sup>5</sup> ] | (K <sub>i</sub> , nM),<br>h, unless noted |                      | Compound<br>in reference | Reference |
|----------------------------------------|---------------------------------------------------|----------------------------------|-------------------------------------------|----------------------|--------------------------|-----------|
|                                        |                                                   |                                  | A <sub>3</sub> AR                         | KOR<br>(TSPO)        |                          |           |
| <i>(N)</i> -Methanocarba derivatives   |                                                   |                                  |                                           |                      |                          |           |
| <b>24</b><br><b>MRS7</b><br><b>220</b> | H                                                 |                                  | 60 (h),<br>396 (m)                        | >10,000<br>(>10,000) | 21                       | 4         |
| <b>25</b><br><b>MRS</b><br><b>5980</b> | NHCH <sub>3</sub>                                 |                                  | 0.70 (h),<br>36 (m)                       | >10,000<br>(>10,000) | 4                        | 8         |
| <b>26</b><br><b>MRS</b><br><b>7154</b> | NH(CH <sub>2</sub> ) <sub>2</sub> CH <sub>3</sub> |                                  | 1.1 (h),<br>6.8 (m)                       | >10,000<br>(1310)    | 12                       | 8         |
| <b>27</b><br><b>MRS</b><br><b>7292</b> | NHCH <sub>3</sub>                                 |                                  | 5.38 (h),<br>>10,000 (m)                  | 3130<br>(>10,000)    | 21                       | 8         |
| <b>28</b><br><b>MRS</b><br><b>7117</b> |                                                   |                                  | 1.06                                      | ND                   | 7                        | 3         |

|                                          |                                                                                     |                                                                                                                                                                            |                       |                      |            |    |
|------------------------------------------|-------------------------------------------------------------------------------------|----------------------------------------------------------------------------------------------------------------------------------------------------------------------------|-----------------------|----------------------|------------|----|
|                                          |                                                                                     | 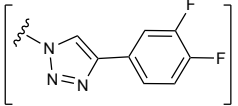                                                                                          |                       |                      |            |    |
| <b>29</b><br><b>MRS</b><br><b>7131</b>   |    | <br>[N <sub>3</sub> ]                                                                     | 1.08                  | ND                   | 33         | 3  |
| <b>30</b><br><b>MRS</b><br><b>5755</b>   |    | <br>     | 100                   | >10,000<br>(1750)    | 11         | 11 |
| <i>Ribose derivatives</i>                |                                                                                     |                                                                                                                                                                            |                       |                      |            |    |
| <b>31</b><br><b>IB-</b><br><b>MECA</b>   |   | <br>[H]                                                                                  | 1.8 (h),<br>0.087 (m) | >10,000<br>(>10,000) | IB-MECA    | 9  |
| <b>4</b><br><b>CI-IB-</b><br><b>MECA</b> |  | <br>[Cl]                                                                                | 1.4 (h),<br>0.18 (m)  | >10,000<br>(>10,000) | CI-IB-MECA | 9  |
| <b>32</b><br><b>MRS</b><br><b>7294</b>   | NHCH <sub>3</sub>                                                                   | <br> | 1.55 (h),<br>1170 (m) | >10,000<br>(>10,000) | 6          | 8  |

|                                        |                                       |                                                                                   |                      |                          |    |   |
|----------------------------------------|---------------------------------------|-----------------------------------------------------------------------------------|----------------------|--------------------------|----|---|
| <b>33</b><br><b>MRS</b><br><b>7295</b> | $\text{NH}(\text{CH}_2)_2\text{CH}_3$ | 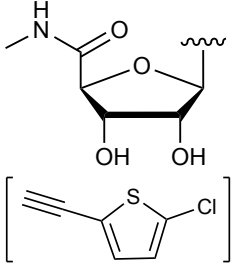 | 6.25 (h),<br>597 (m) | $>10,000$<br>$(>10,000)$ | 7  | 8 |
| <b>34</b><br><b>MRS</b><br><b>7296</b> | $\text{NHCH}_3$                       |  | 11.5 (h),<br>34 (m)  | $>10,000$<br>$(>10,000)$ | 20 | 8 |

<sup>a</sup> The binding affinity for human (h) or mouse (m) A<sub>3</sub>AR (expressed in CHO cells) as a K<sub>i</sub> values using agonist [<sup>125</sup>I]N<sup>6</sup>-(4-amino-3-iodobenzyl)adenosine-5'-N-methyluronamide. See reference provided for more detail. ND, not determined.

**TABLE S3**

A<sub>3</sub>AR, KOR ( $\kappa$ -opioid) and translocator protein (TSPO) affinity of N<sup>6</sup> and C2 modifications of adenine and 7-deazaadenine derivatives. R<sup>4</sup> is either H or CH<sub>3</sub>. References are listed on p. S14.

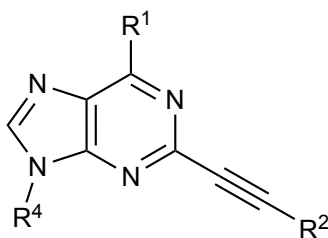

35 – 37, 40

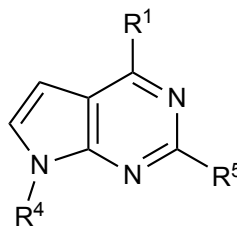

38, 39

| No.                       | R <sup>1</sup> | R <sup>2</sup> | (K <sub>i</sub> , nM, or % inhibition at 10 μM),<br>h, unless noted |                      |                          | Reference |
|---------------------------|----------------|----------------|---------------------------------------------------------------------|----------------------|--------------------------|-----------|
|                           |                |                | A <sub>3</sub> AR                                                   | KOR<br>(TSPO)        | Compound<br>in reference |           |
| <i>R</i> <sup>4</sup> = H |                |                |                                                                     |                      |                          |           |
| <b>35</b><br>MRS<br>5923  |                |                | 120                                                                 | >10,000<br>(>10,000) | 14                       | 6         |
| <b>36</b><br>MRS<br>7327  |                |                | 128                                                                 | >10,000<br>(>10,000) | 23                       | 6         |
| <b>37a</b><br>MRS<br>7350 |                |                | 13 (h),<br>>10,000 (m)                                              | >10,000<br>(>10,000) | 24                       | 6         |
| <b>37b</b><br>MRS<br>7610 |                |                | 20%                                                                 | ND                   | 25                       | 6         |
| <b>37c</b><br>MRS<br>7608 |                |                | 6820                                                                | ND                   | 26                       | 6         |



|                                                    |  |   |                         |                      |    |          |
|----------------------------------------------------|--|---|-------------------------|----------------------|----|----------|
| <b>38<sup>b</sup></b><br><b>MRS</b><br><b>7883</b> |  | I | 826±51                  | 9%<br>(27%)          | -  | New here |
| <b>39<sup>b</sup></b><br><b>MRS</b><br><b>7884</b> |  |   | 260±9                   | 4080<br>(960)        | -  | New here |
| $R^4 = CH_3$                                       |  |   |                         |                      |    |          |
| <b>40</b><br><b>MRS</b><br><b>7320</b>             |  |   | 116 (h),<br>>10,000 (m) | >10,000<br>(>10,000) | 27 | 6        |

<sup>a</sup> The binding affinity for human (h) or mouse (m) A<sub>3</sub>AR (expressed in CHO cells) as a K<sub>i</sub> values using agonist [<sup>125</sup>I]N<sup>6</sup>-(4-amino-3-iodobenzyl)adenosine-5'-N-methyluronamide. A percent refers to inhibition of binding at 10 μM. See reference provided for more detail. ND, not determined.

<sup>b</sup> The binding affinity (μM) at s<sub>2</sub> receptor: **38**, 4.0; **39**, 2.7.

**TABLE S4**

A<sub>3</sub>AR affinity of N<sup>6</sup> and C2 modifications of (N)-methanocarpa 5'-ester derivatives. R<sup>2</sup> is 2-chloro-thien-5-yl, unless noted. X, Y, Z = N, unless noted.<sup>a</sup> References are listed on p. S14.

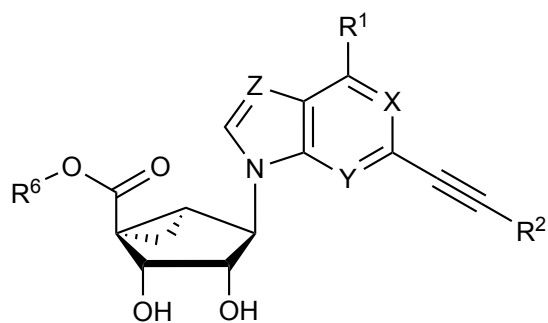**41 – 51**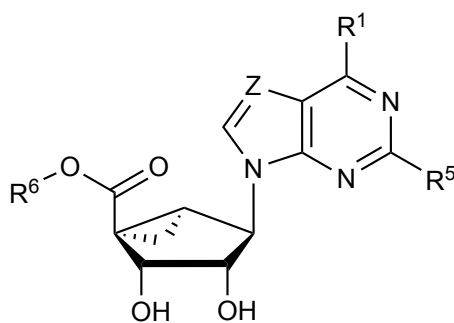**52 – 64**

| No.                                    | R <sup>1</sup>    | R <sup>6</sup><br>(and other)               | (K <sub>i</sub> , nM, or % inhibition at 10 μM),<br>h, unless noted |                   | Source                   |           |
|----------------------------------------|-------------------|---------------------------------------------|---------------------------------------------------------------------|-------------------|--------------------------|-----------|
|                                        |                   |                                             | A <sub>3</sub> AR                                                   | KOR<br>(TSPO)     | Compound<br>in reference | Reference |
| <i>X, Y, Z as indicated</i>            |                   |                                             |                                                                     |                   |                          |           |
| <b>41</b><br><b>MRS</b><br><b>7232</b> | NHCH <sub>3</sub> | CH <sub>2</sub> CH <sub>3</sub>             | 14.5 (h),<br>>10,000 (m)                                            | 396<br>(1290)     | 24                       | 5         |
| <b>42</b><br><b>MRS</b><br><b>7332</b> | NHCH <sub>3</sub> | CH <sub>2</sub> CH <sub>3</sub><br>(X = CH) | 29.4 (h),<br>828 (m)                                                | 806<br>(3810)     | 26                       | 5         |
| <b>43</b><br><b>MRS</b><br><b>7315</b> | NHCH <sub>3</sub> | CH <sub>2</sub> CH <sub>3</sub><br>(Y = CH) | 47.3 (h),<br>>10,000 (m)                                            | >10,000<br>(3390) | 27                       | 5         |
| <b>44</b><br><b>MRS</b><br><b>7299</b> | NHCH <sub>3</sub> | CH <sub>2</sub> CH <sub>3</sub><br>(Z = CH) | 448 (h),<br>>10,000 (m)                                             | 42<br>(869)       | 28                       | 5         |

| <i>R<sup>6</sup> as indicated, X, Y, Z = N</i>                   |                   |                                                                                                         |                          |                       |    |   |
|------------------------------------------------------------------|-------------------|---------------------------------------------------------------------------------------------------------|--------------------------|-----------------------|----|---|
| <b>45</b><br><b>MRS</b><br><b>7251</b>                           | NHCH <sub>3</sub> | (CH <sub>2</sub> ) <sub>2</sub> CH <sub>3</sub>                                                         | 5.78 (h),<br>2810 (m)    | 437<br>(1060)         | 30 | 5 |
| <b>46</b><br><b>MRS</b><br><b>7252</b>                           | NHCH <sub>3</sub> | CH(CH <sub>3</sub> ) <sub>2</sub>                                                                       | 42.9 (h),<br>>10,000 (m) | >10,000<br>(>10,000)  | 31 | 5 |
| <b>47</b><br><b>MRS</b><br><b>7304</b>                           | NHCH <sub>3</sub> | (CH <sub>2</sub> ) <sub>3</sub> CH <sub>3</sub>                                                         | 17.5 (h),<br>~10,000 (m) | 1210<br>(>10,000)     | 32 | 5 |
| <b>48</b><br><b>MRS</b><br><b>7305</b>                           | NHCH <sub>3</sub> | (CH <sub>2</sub> ) <sub>2</sub> -<br>CH(CH <sub>3</sub> ) <sub>2</sub>                                  | 24.4 (h),<br>>10,000 (m) | 1090<br>(>10,000)     | 33 | 5 |
| <b>49</b><br><b>MRS</b><br><b>7316</b>                           | NHCH <sub>3</sub> | (CH <sub>2</sub> ) <sub>2</sub> -c-Hex                                                                  | 334 (h),<br>>10,000 (m)  | >10,000<br>(>10,000)  | 34 | 5 |
| <b>50</b><br><b>MRS</b><br><b>7317</b>                           | NHCH <sub>3</sub> | CH <sub>2</sub> Ph                                                                                      | 7.81 (h),<br>891 (m)     | 629<br>(4050)         | 35 | 5 |
| <b>51</b><br><b>MRS</b><br><b>7318</b>                           | NHCH <sub>3</sub> | (CH <sub>2</sub> ) <sub>2</sub> Ph                                                                      | 114 (h),<br>>10,000 (m)  | 3670<br>(>10,000)     | 36 | 5 |
| <b>52</b><br><b>MRS</b><br><b>7319</b>                           | NHCH <sub>3</sub> | (CH <sub>2</sub> ) <sub>3</sub> Ph                                                                      | 132 (h),<br>>10,000 (m)  | 8920<br>(1090)        | 37 | 5 |
| <i>R<sup>6</sup> = CH<sub>2</sub>CH<sub>3</sub>, X, Y, Z = N</i> |                   |                                                                                                         |                          |                       |    |   |
| <b>53</b><br><b>MRS</b><br><b>7333</b>                           | NHCH <sub>3</sub> | R <sup>5</sup> =<br>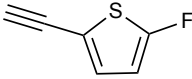 | 10.4 (h),<br>625 (m)     | 2650±880<br>(>10,000) | 23 | 8 |

|                                                    |                   |             |                         |                   |    |          |
|----------------------------------------------------|-------------------|-------------|-------------------------|-------------------|----|----------|
| <b>54</b><br><b>MRS</b><br><b>7636</b>             |                   | $R^5 =$<br> | 32.8 (h)<br>104 (m)     | 23%<br>(1880)     | 29 | 10       |
| <b>55</b><br><b>MRS</b><br><b>7626</b>             |                   | $R^5 =$<br> | 37.4                    | 32%<br>(890)      | 28 | 10       |
| $R^6 = CH_2CH_3, Z = CH$                           |                   |             |                         |                   |    |          |
| <b>56</b><br><b>MRS</b><br><b>7331</b>             | NHCH <sub>3</sub> | $R^5 = I$   | 390                     | 104<br>(>10,000)  | 39 | 5        |
| <b>57</b><br><b>MRS</b><br><b>7335</b>             | NHCH <sub>3</sub> | $R^5 =$<br> | 344 (h),<br>>10,000 (m) | 91.5<br>(>10,000) | 40 | 5        |
| <b>58</b><br><b>MRS</b><br><b>7347</b>             |                   | $R^5 =$<br> | 228 (h),<br>>10,000 (m) | 852<br>(>10,000)  | 41 | 5        |
| <b>59</b><br><b>MRS</b><br><b>7348</b>             |                   | $R^5 =$<br> | 791 (h),<br>>10,000 (m) | 1400<br>(4470)    | 42 | 5        |
| <b>60</b><br><b>MRS</b><br><b>7343</b>             |                   | $R^5 =$<br> | 483 (h),<br>~10,000 (m) | 207<br>(480)      | 43 | 5        |
| <b>61<sup>b</sup></b><br><b>MRS</b><br><b>7820</b> |                   | $R^5 =$<br> | 4330                    | 146<br>(3000)     | -  | New here |
| <b>62<sup>b</sup></b><br><b>MRS</b><br><b>7819</b> |                   | $R^5 =$<br> | 3760                    | 167<br>(345)      | -  | New here |

|                                                    |                                                                                   |                                                                                                    |      |               |   |          |
|----------------------------------------------------|-----------------------------------------------------------------------------------|----------------------------------------------------------------------------------------------------|------|---------------|---|----------|
| <b>63<sup>b</sup></b><br><b>MRS</b><br><b>7801</b> | 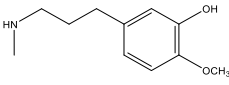 | R <sup>5</sup> =  | 2300 | 764<br>(1610) | - | New here |
| <b>64<sup>b</sup></b><br><b>MRS</b><br><b>7800</b> |  | R <sup>5</sup> =  | 1620 | 341<br>(1270) | - | New here |

<sup>a</sup> The binding affinity for human (h) or mouse (m) A<sub>3</sub>AR (expressed in CHO cells) as a K<sub>i</sub> values using agonist [<sup>125</sup>I]N<sup>6</sup>-(4-amino-3-iodobenzyl)adenosine-5'-N-methyluronamide. See reference provided for more detail.

<sup>b</sup> The binding affinity (μM) at s<sub>2</sub> receptor: **61**, 0.87; **62**, 0.92; **63**, 2.8; **64**, 1.1. The binding affinity (μM) at d opioid receptor: **61**, 0.52; **62**, 0.63; **64**, 3.9; m opioid receptor: **61**, 0.93; **62**, 0.78; **63**, 1.9; **64**, 1.95; GABA<sub>A</sub> receptor: **62**, 4.1; DAT, 4.3; b<sub>3</sub> receptor **61**, 5.7.

**Off-target binding activity determined by the Psychoactive Drug Screening Program (PDSP) at the University of North Carolina.** We thank Dr. Bryan L. Roth (Univ. North Carolina at Chapel Hill) and National Institute of Mental Health's Psychoactive Drug Screening Program (Contract # HHSN-271-2008-00025-C) for screening data. Initially, the compounds are tested at 10 μM in a primary screen at 45 different receptors, transporters and channels. If the percent of binding inhibition exceeds 50% at any of the targets listed below, a secondary screen of that compound is performed with a full concentration-response curve (concentrations of 0.1 nM to 10 μM, in increments of half-integral log values).

Unless noted in the text, no significant interactions (<50% inhibition at 10 μM) for any of the nucleosides were found at the following sites (human unless noted): 5HT<sub>1A</sub> (serotonin), 5HT<sub>1B</sub>, 5HT<sub>1D</sub>, 5HT<sub>1E</sub>, 5HT<sub>2A</sub>, 5HT<sub>2B</sub>, 5HT<sub>2C</sub>, 5HT<sub>3</sub>, 5HT<sub>5A</sub>, 5HT<sub>6</sub>, 5HT<sub>7</sub>, α<sub>1A</sub> (adrenergic), α<sub>1B</sub>, α<sub>1D</sub>, α<sub>2A</sub>, α<sub>2B</sub>, α<sub>2C</sub>, β<sub>1</sub>, β<sub>2</sub>, β<sub>3</sub>, BZP (benzodiazepine) rat brain site, D<sub>1</sub> (dopamine), D<sub>2</sub>, D<sub>3</sub>, D<sub>4</sub>, D<sub>5</sub>, delta opioid receptor (DOR), kappa opioid receptor (KOR), GABA<sub>A</sub>, H<sub>1</sub> (histamine), H<sub>2</sub>, H<sub>3</sub>, H<sub>4</sub>, M<sub>1</sub> (muscarinic acetylcholine), M<sub>2</sub>, M<sub>3</sub>, M<sub>4</sub>, M<sub>5</sub>, mu opioid receptor (MOR), σ<sub>1</sub>, σ<sub>2</sub> (sigma), DAT (dopamine transporter), NET (norepinephrine transporter), SERT (serotonin transporter), TSPO (translocator protein).

Reference: Besnard, J.; Ruda, G. F.; Setola, V.; Abecassis, K.; Rodriguiz, R. M.; Huang, X. P.; Norval, S.; Sassano, M. F.; Shin, A. I.; Webster, L. A.; Simeons, F. R.; Stojanovski, L.; Prat, A.; Seidah, N. G.; Constam, D. B.; Bickerton, G. R.; Read, K. D.; Wetsel, W. C.; Gilbert, I. H.; Roth, B. L.; Hopkins, A. L. Automated design of ligands to polypharmacological profiles. *Nature* **2012**, *492*, 215–220.

Procedures: <https://pdsp.unc.edu/pdspweb/content/UNC-CH%20Protocol%20Book.pdf>

## References

1. Tosh, D.K., Deflorian, F., Phan, K., Gao, Z.G., Wan, T.C., Gizewski, E., Auchampach, J.A., Jacobson, K.A. Structure-guided design of A<sub>3</sub> adenosine receptor-selective nucleosides: Combination of 2-arylethynyl and bicyclo[3.1.0]hexane substitutions. *J. Med. Chem.*, 2012, 55:4847-4860.
2. Tosh, D.K., Paoletta, S., Chen, Z., Moss, S. M., Gao, Z.G., Salvemini, D., Jacobson, K.A. Extended N<sup>6</sup> Substitution of rigid C2-arylethynyl nucleosides for exploring the role of extracellular loops in ligand recognition at the A<sub>3</sub> adenosine receptor. *Bioorg. Med. Chem. Lett.*, 2014, 24:3302-3306.
3. Tosh, D.K., Paoletta, S., Chen, Z., Crane, S., Lloyd, J., Gao, Z.G., Gizewski, E.T., Auchampach, J.A., Salvemini, D., Jacobson, K.A. Structure-based design, synthesis by click chemistry and in vivo activity of highly selective A<sub>3</sub> adenosine receptor agonists. *Med. Chem. Commun.*, 2015, 6:555-563.
4. Tosh, D.K., Ciancetta, A., Warnick, E., O'Connor, R., Chen, Z., Gizewski, E., Crane, S., Gao, Z.G., Auchampach, J.A., Salvemini, D., Jacobson, K.A. Purine (N)-methanocarba nucleoside derivatives lacking an exocyclic amine as selective A<sub>3</sub> adenosine receptor agonists. *J. Med. Chem.*, 2016, 59:3249-3263.
5. Tosh, D.K., Ciancetta, A., Mannes, P., Warnick, E., Janowsky, A., Eshleman, A.J., Gizewski, E., Brust, T.F., Bohn, L.M., Auchampach, J.A., Gao, Z.G., Jacobson, K.A. Repurposing of a nucleoside scaffold from adenosine receptor agonists to opioid receptor antagonists. *ACS Omega*, 2018, 3:12658-12678.
6. Yu, J., Mannes, P., Jung, Y.H., Ciancetta, A., Bitant, A., Lieberman, D.I., Khaznadar, S., Auchampach, J.A., Gao, Z.G., Jacobson, K.A. Structure activity relationship of 2-arylalkynyl-adenine derivatives as human A<sub>3</sub> adenosine receptor antagonists. *Med. Chem. Commun.*, 2018, 9:1920–1932.
7. Abel, B., Tosh, D.K., Durell, S. R., Murakami, M., Vaheldi, S., Jacobson, K.A., Ambudkar, S.V. Evidence for the interaction of A<sub>3</sub> adenosine receptor agonists at the drug-binding site(s) of human P-glycoprotein (ABCB1). *Mol. Pharmacol.*, 2019, 96:180–192.
8. Tosh, D.K., Salmaso, V., Rao, H., Campbell, R., Bitant, A., Gao, Z.G., Auchampach, J.A., Jacobson, K.A. Direct comparison of (N)-methanocarba and ribose-containing 2-arylalkynyladenosine derivatives as A<sub>3</sub> receptor agonists. *ACS Med. Chem. Lett.*, 2020, 11:1935–1941.
9. Carlin, J.L., Jain, S., Gizewski, E., Wan, T.C., Tosh, D.K., Xiao, C., Auchampach, J.A., Jacobson, K.A., Gavrilova, O., Reitman, M.L. Hypothermia in mouse is caused by adenosine A<sub>1</sub> and A<sub>3</sub> receptor agonists and AMP via three distinct mechanisms. *Neuropharmacology*, 2017, 114:101-113.
10. Tosh, D.K., Salmaso, V., Campbell, R.G., Rao, H., Bitant, A., Pottie, E., Stove, C.P., Liu, N., Gavrilova, O., Gao, Z.G., Auchampach, J.A., Jacobson, K.A. A<sub>3</sub> adenosine receptor agonists containing dopamine moieties for enhanced interspecies affinity. 2021, *Eur. J. Med. Chem.*, in press.
11. Tosh, D.K., Paoletta, S., Phan, K., Gao, Z.G., Jacobson, K.A. Truncated nucleosides as A<sub>3</sub> adenosine receptor ligands: Combined 2-arylethynyl and bicyclohexane substitutions. *ACS Med. Chem. Lett.*, 2012, 3:596-601.

## Chemical synthesis

**Scheme S1.** Synthesis of 7-deaza-adenine (7*H*-pyrrolo[2,3-*d*]pyrimidin-4-amine) derivatives. Reagents and conditions: (i) 3-OH-4-OMe-Ph(CH<sub>2</sub>)<sub>2</sub>NH<sub>2</sub>, DIPEA, 2-propanol, 70 °C, 68%; (ii) 5-Cl-thienyl, PdCl<sub>2</sub>(Ph<sub>3</sub>)<sub>2</sub>, CuI, Et<sub>3</sub>N, DMF, rt, 76%.

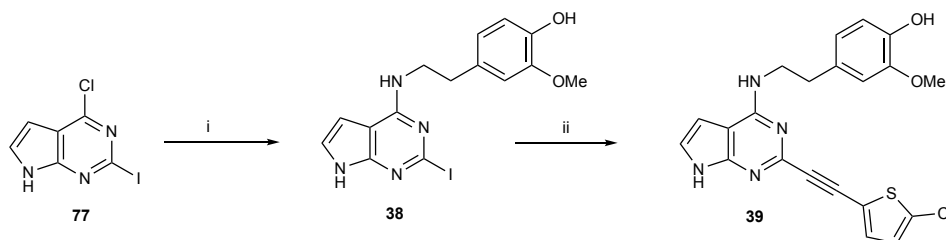

## Materials and instrumentation

All reagents and solvents were purchased from Sigma-Aldrich (St. Louis, MO, USA). <sup>1</sup>H NMR spectra were obtained with a Bruker 400 spectrometer using CDCl<sub>3</sub>, CD<sub>3</sub>OD and DMSO as solvents. Chemical shifts are expressed in δ values (ppm) with tetramethylsilane (δ 0.00) for CDCl<sub>3</sub> and water (δ 3.30) for CD<sub>3</sub>OD. NMR spectra were collected with a Bruker AV spectrometer equipped with a z-gradient [<sup>1</sup>H, <sup>13</sup>C, <sup>15</sup>N]-cryoprobe. TLC analysis was carried out on glass sheets precoated with silica gel F254 (0.2 mm) from Aldrich. The purity of final nucleoside derivatives was checked using a Hewlett–Packard 1100 HPLC equipped with a Zorbax SB-Aq 5 μm analytical column (50 × 4.6 mm; Agilent Technologies Inc., Palo Alto, CA, USA). Mobile phase: linear gradient solvent system, 5 mM TBAP (tetrabutylammoniumdihydrogenphosphate):CH<sub>3</sub>CN from 80:20 to 0:100 in 13 min; the flow rate was 0.5 mL/min. Peaks were detected by UV absorption with a diode array detector at 230, 254, and 280 nm. All derivatives tested for biological activity showed >95% purity by HPLC analysis (detection at 254 nm). Low-resolution mass spectrometry was performed with a JEOL SX102 spectrometer with 6-kV Xe atoms following desorption from a glycerol matrix or on an Agilent LC/MS 1100 MSD, with a Waters (Milford, MA, USA) Atlantis C18 column. High resolution mass spectroscopic (HRMS) measurements were performed on a proteomics optimized Q-TOF-2 (Micromass-Waters) using external calibration with polyalanine, unless noted. Observed mass accuracies are those expected based on known performance of the instrument as well as trends in masses of standard compounds observed at intervals during the series of measurements. Reported masses are observed masses uncorrected for this time-dependent drift in mass accuracy. All of the monosubstituted alkyne intermediates were purchased from Sigma-Aldrich (St. Louis, MO), Small Molecules, Inc. (Hoboken, NJ, USA), Anichem (North Brunswick, NJ, USA), PharmaBlock, Inc. (Sunnyvale, CA, USA), Frontier Scientific (Logan, UT, USA) and Tractus (Perrineville, NJ, USA).

**(1*R*,2*R*,3*S*,4*R*,5*S*)-4-(6-((3-azidobenzyl)amino)-2-((3,4-difluorophenyl)ethynyl)-9*H*-purin-9-yl)-1-(hydroxymethyl)bicyclo[3.1.0]hexane-2,3-diol (12)**

A solution of compound **69** (27 mg, 0.04 mmol) in methanol (2.0 mL) and 10% trifluoroacetic acid (2.0 mL) was heated at 70 °C for 1.5 h. Solvent was evaporated under vacuum and the residue was purified on flash silica gel column chromatography (CH<sub>2</sub>Cl<sub>2</sub>:MeOH = 15:1) to give the compound **12** (22 mg, 89%) as colorless syrup. <sup>1</sup>H NMR (CD<sub>3</sub>OD, 400 MHz)  $\delta$  8.52 (s, 1H), 7.58-7.53 (m, 1H), 7.47-7.44 (m, 1H), 7.36-7.29 (m, 2H), 7.23-7.21 (m, 1H), 7.15 (s, 1H), 6.96-6.94 (m, 1H), 4.87 (br s, 2H), 4.84-4.79 (m, 1H), 4.32 (d, *J* = 11.6 Hz, 1H), 3.91 (d, *J* = 6.4 Hz, 1H), 1.68-1.65 (m, 1H), 1.56 (t, *J* = 4.8 Hz, 1H), 0.78-0.75 (m, 1H). HRMS calculated for C<sub>27</sub>H<sub>23</sub>N<sub>8</sub>O<sub>3</sub>F<sub>2</sub> (M + H)<sup>+</sup>: 545.1861; found 545.1865.

**(1S,2R,3S,4R,5S)-4-(2-((3,4-Difluorophenyl)ethynyl)-6-((3-(4-(4-fluorophenyl)-1H-1,2,3-triazol-1-yl)benzyl)amino)-9H-purin-9-yl)-2,3-dihydroxy-N-methylbicyclo[3.1.0]hexane-1-carboxamide (16)**

*p*-Fluoro-phenyl acetylene (5 mg, 0.014 mmol) was added to a solution of compound **65** (16 mg, 0.028 mmol) in a mixture of <sup>t</sup>BuOH (0.7 mL) and water (0.7 mL). Subsequently freshly prepared 1M sodium ascorbate solution (28  $\mu$ L, 0.028 mmol) followed by 7.5% solution of copper sulphate (47  $\mu$ L, 0.014 mmol) was added into the reaction mixture and the mixture stirred at room temperature overnight. Solvent was evaporated and the residue was purified on flash silica gel column chromatography (CH<sub>2</sub>Cl<sub>2</sub>:MeOH = 20:1) to give the compound **16** (17.5 mg, 90%) as a colorless syrup. <sup>1</sup>H NMR (CD<sub>3</sub>OD, 400 MHz)  $\delta$  8.80 (s, 1H), 8.12 (s, 1H), 8.03 (s, 1H), 7.87-7.84 (m, 2H), 7.78-7.73 (m, 2H), 7.55-7.53 (m, 2H), 7.51-7.46 (m, 1H), 7.40-7.37 (m, 1H), 7.31-7.17 (m, 1H), 7.15-7.13 (m, 2H), 5.04 (d, *J* = 6.4 Hz, 1H), 4.96 (br s, 2H), 4.02 (d, *J* = 6.4 Hz, 1H), 2.84 (d, *J* = 4.4 Hz, 3H), 2.12-2.09 (m, 1H), 1.87 (t, *J* = 5.2 Hz, 1H), 1.40-1.37 (m, 1H). HRMS calculated for C<sub>36</sub>H<sub>29</sub>N<sub>9</sub>O<sub>3</sub>F<sub>3</sub> (M + H)<sup>+</sup>: 692.2345; found 692.2355.

**(1S,2R,3S,4R,5S)-4-(6-((3-(4-(3,5-Difluorophenyl)-1H-1,2,3-triazol-1-yl)benzyl)amino)-2-((3,4-difluorophenyl)ethynyl)-9H-purin-9-yl)-2,3-dihydroxy-N-methylbicyclo[3.1.0]hexane-1-carboxamide (18)**

Compound **18** (88%) was prepared from compound **65** following the same method as for compound **16**. <sup>1</sup>H NMR (CD<sub>3</sub>OD, 400 MHz)  $\delta$  8.91 (s, 1H), 8.12 (s, 1H), 8.02 (s, 1H), 7.76-7.73 (m, 1H), 7.55-7.50 (m, 2H), 7.49-7.44 (m, 3H), 7.43-7.36 (m, 1H), 7.30-7.23 (m, 1H), 6.94-6.90 (m, 1H), 5.03 (d, *J* = 6.4 Hz, 1H), 4.96 (br s, 2H), 4.85 (s, 1H), 4.01 (d, *J* = 6.4 Hz, 1H), 2.83 (s, 3H), 2.12-2.09 (m, 1H), 1.87 (t, *J* = 4.8 Hz, 1H), 1.40-1.37 (m, 1H). HRMS calculated for C<sub>36</sub>H<sub>28</sub>N<sub>9</sub>O<sub>3</sub>F<sub>4</sub> (M + H)<sup>+</sup>: 710.2251; found 710.2258.

**(1S,2R,3S,4R,5S)-4-(6-((3-(4-(2,4-Difluorophenyl)-1H-1,2,3-triazol-1-yl)benzyl)amino)-2-((3,4-difluorophenyl)ethynyl)-9H-purin-9-yl)-2,3-dihydroxy-N-methylbicyclo[3.1.0]hexane-1-carboxamide (19)**



Compound **19** (89%) was prepared from compound **65** following the same method as for compound **16**. <sup>1</sup>H NMR (CD<sub>3</sub>OD, 400 MHz)  $\delta$  8.68 (d, *J* = 3.2 Hz, 1H), 8.18-8.11 (m, 2H), 8.04 (s, 1H), 7.78-7.75 (m, 1H), 7.54-7.46 (m, 3H), 7.40-7.37 (m, 1H), 7.31-7.24 (m, 1H), 7.11-7.03 (m, 2H), 5.04 (d, *J* = 6.4 Hz, 1H), 4.94 (br s, 2H), 4.85 (s, 1H), 2.83 (s, 3H), 2.12-2.09 (m, 1H), 1.87 (t, *J* = 4.8 Hz, 1H), 1.40-1.36 (m, 1H). HRMS calculated for C<sub>36</sub>H<sub>28</sub>N<sub>9</sub>O<sub>3</sub>F<sub>4</sub> (M + H)<sup>+</sup>: 710.2251; found 710.2252.

**(1S,2R,3S,4R,5S)-4-(2-((3,4-Difluorophenyl)ethynyl)-6-((3-(4-(3,4,5-trifluorophenyl)-1H-1,2,3-triazol-1-yl)benzyl)amino)-9H-purin-9-yl)-2,3-dihydroxy-N-methylbicyclo[3.1.0]hexane-1-carboxamide (20)**

Compound **20** (90%) was prepared from compound **65** following the same method as for compound **16**. <sup>1</sup>H NMR (CD<sub>3</sub>OD, 400 MHz)  $\delta$  8.86 (s, 1H), 8.12 (s, 1H), 7.99 (s, 1H), 7.75-7.71 (m, 1H), 7.59-7.50 (m, 4H), 7.48-7.43 (m, 1H), 7.33-7.30 (m, 1H), 7.28-7.24 (m, 1H), 5.02 (d, *J* = 6.4 Hz, 1H), 4.94 (br s, 2H), 4.84 (s, 1H), 4.00 (d, *J* = 6.4 Hz, 1H), 2.83 (s, 3H), 2.11-2.08 (m, 1H), 1.87 (t, *J* = 4.8 Hz, 1H), 1.40-1.36 (m, 1H). HRMS calculated for C<sub>36</sub>H<sub>27</sub>N<sub>9</sub>O<sub>3</sub>F<sub>5</sub> (M + H)<sup>+</sup>: 728.2157; found 728.2150.

**(1S,2R,3S,4R,5S)-4-(2-((3,4-Difluorophenyl)ethynyl)-6-((3-(4-(4-(trifluoromethyl)phenyl)-1H-1,2,3-triazol-1-yl)benzyl)amino)-9H-purin-9-yl)-2,3-dihydroxy-N-methylbicyclo[3.1.0]hexane-1-carboxamide (21)**

Compound **21** (87%) was prepared from compound **65** following the same method as for compound **16**. <sup>1</sup>H NMR (CD<sub>3</sub>OD, 400 MHz)  $\delta$  8.96 (s, 1H), 8.16 (s, 1H), 8.12-7.99 (m, 3H), 7.78-7.73 (m, 1H), 7.71-7.69 (m, 2H), 7.55-7.54 (m, 2H), 7.50-7.45 (m, 1H), 7.37 (br s, 1H), 7.29-7.23 (m, 1H), 5.03 (d, *J* = 6.4 Hz, 1H), 4.96 (br s, 2H), 4.85 (s, 1H), 4.01 (d, *J* = 6.4 Hz, 1H), 2.83 (s, 3H), 2.11-2.08 (m, 1H), 1.87 (d, *J* = 4.8 Hz, 1H), 1.39-1.36 (m, 1H). HRMS calculated for C<sub>37</sub>H<sub>29</sub>N<sub>9</sub>O<sub>3</sub>F<sub>5</sub> (M + H)<sup>+</sup>: 742.2314; found 742.2305.

**(1R,2R,3S,4R,5S)-4-(2-((3,4-difluorophenyl)ethynyl)-6-((3-(4-(4-fluorophenyl)-1H-1,2,3-triazol-1-yl)benzyl)amino)-9H-purin-9-yl)-1-(hydroxymethyl)bicyclo[3.1.0]hexane-2,3-diol (22)**

Compound **22** (88%) was prepared from compound **65** following the same method as for compound **12**. <sup>1</sup>H NMR (CD<sub>3</sub>OD, 400 MHz)  $\delta$  8.82 (s, 1H), 8.54 (s, 1H), 8.04 (s, 1H), 7.88-7.85 (m, 2H), 7.79-7.76 (m, 1H), 7.56-7.47 (m, 3H), 7.41-7.38 (m, 1H), 7.30-7.24 (m, 1H), 7.15 (t, *J* = 8.8 Hz, 2H), 4.97 (br s, 2H), 4.86 (s, 1H), 4.80 (d, *J* = 6.4 Hz, 1H), 4.31 (d, *J* = 7.6 Hz, 1H), 3.89 (d, *J* = 7.6 Hz, 1H), 1.67-1.64 (m, 1H), 1.56 (t, *J* = 4.4 Hz, 1H), 0.78-0.75 (m, 1H). HRMS calculated for C<sub>35</sub>H<sub>28</sub>N<sub>8</sub>O<sub>3</sub>F<sub>3</sub> (M + H)<sup>+</sup>: 665.2236; found 665.2235.

**(1R,2R,3S,4R,5S)-4-(6-((3-(4-(3,4-Difluorophenyl)-1H-1,2,3-triazol-1-yl)benzyl)amino)-2-((3,4-difluorophenyl)ethynyl)-9H-purin-9-yl)-1-(hydroxymethyl)bicyclo[3.1.0]hexane-2,3-diol (23)**

Compound **23** (87%) was prepared from compound **65** following the same method as for compound **12**. <sup>1</sup>H NMR (CD<sub>3</sub>OD, 400 MHz)  $\delta$  8.86 (s, 1H), 8.54 (s, 1H), 8.03 (s, 1H), 7.78-7.72 (m, 2H), 7.67-7.64 (m, 1H), 7.56-7.54 (m, 2H), 7.52-7.47 (m, 1H), 7.41-7.38 (m, 1H), 7.35-7.24 (m, 2H), 4.97 (br s, 2H), 4.85 (s, 1H), 4.79 (d, *J* = 6.8 Hz, 1H), 4.31 (d, *J* = 11.6 Hz, 1H), 3.89 (d, *J* = 6.4 Hz, 1H), 1.67-1.64 (m, 1H), 1.56 (d, *J* = 4.4 Hz, 1H), 0.78-0.75 (m, 1H). HRMS calculated for C<sub>35</sub>H<sub>27</sub>N<sub>8</sub>O<sub>3</sub>F<sub>4</sub> (M + H)<sup>+</sup>: 683.2142; found 683.2138.

**4-(2-((2-Iodo-7H-pyrrolo[2,3-d]pyrimidin-4-yl)amino)ethyl)-2-methoxyphenol (38)**

4-Hydroxy-3-methoxy-phenylethyl amine (172.2 mg, 0.161 mmol) and DIPEA (0.35 mL, 3.2 mmol) was added to a solution of compound **77** (90 mg, 0.32 mmol) in 2-propanol (2.0 mL) and heated at 70 °C for 3 h. Solvent was evaporated and the residue was purified on flash silica gel column chromatography (hexane: ethyl acetate = 2:1) to give the compound **38** (89 mg, 68%) as a colorless syrup. <sup>1</sup>H NMR (CD<sub>3</sub>OD, 400 MHz)  $\delta$  6.93 (d, *J* = 3.6 Hz, 1H), 6.83 (s, 1H), 6.73-6.68 (m, 2H), 6.46 (d, *J* = 3.2 Hz, 1H), 3.81 (s, 3H), 3.70 (t, *J* = 7.6 Hz, 2H), 2.87 (t, *J* = 7.6 Hz, 2H). HRMS calculated for C<sub>15</sub>H<sub>16</sub>N<sub>4</sub>O<sub>2</sub>I (M + H)<sup>+</sup>: 411.0318; found 411.0323.

**4-(2-((2-((5-Chlorothiophen-2-yl)ethynyl)-7H-pyrrolo[2,3-d]pyrimidin-4-yl)amino)ethyl)-2-methoxyphenol (39)**

PdCl<sub>2</sub>(PPh<sub>3</sub>)<sub>2</sub> (8.5 mg, 0.017 mmol), 2-chloro-5-ethynylthiophene (52 mg, 0.26 mmol), CuI (1mg, 0.006 mmol) and triethylamine (80  $\mu$ L, 0.60 mmol) were added to a solution of compound **38** (25 mg, 0.08 mmol) in anhydrous DMF (1.0 mL) and the mixture stirred at room temperature overnight. Solvent was evaporated under vacuum and the residue was purified on flash silica gel column chromatography (hexane:ethyl acetate = 1:2) to give the alkyne derivative **39** (28 mg, 76%) as a syrup. <sup>1</sup>H NMR (CD<sub>3</sub>OD, 400 MHz)  $\delta$  7.29 (d, *J* = 4.0 Hz, 1H), 7.14 (d, *J* = 3.2 Hz, 1H), 7.00 (d, *J* = 4.0 Hz, 1H), 6.85 (s, 1H), 6.74-6.69 (m, 2H), 6.56 (d, *J* = 3.2 Hz, 1H), 3.79-3.76 (m, 5H), 2.91 (t, *J* = 7.2 Hz, 2H). HRMS calculated for C<sub>21</sub>H<sub>18</sub>N<sub>4</sub>O<sub>2</sub>SCI (M + H)<sup>+</sup>: 623.1731; found 623.1736.

**Ethyl (1S,2R,3S,4R,5S)-2,3-dihydroxy-4-(2-(phenylethynyl)-4-((3-phenylpropyl)amino)-7H-pyrrolo[2,3-d]pyrimidin-7-yl)bicyclo[3.1.0]hexane-1-carboxylate (61)**

A solution of compound **73** (22 mg, 0.03 mmol) in methanol (2.0 mL) and 10% trifluoroacetic acid (2.0 mL) was heated at 70 °C for 2 h. Solvent was evaporated under vacuum and the residue was purified on flash silica gel column chromatography (CH<sub>2</sub>Cl<sub>2</sub>:MeOH = 25:1) to give the compound **61** (18 mg, 90%) as colorless syrup. <sup>1</sup>H NMR (CD<sub>3</sub>OD, 400 MHz)  $\delta$  7.70-7.68 (m, 2H), 7.49-7.46 (m, 3H), 7.28-7.23 (m, 4H), 7.16-7.14 (m, 2H), 6.70 (d, *J* = 2.4 Hz, 1H), 5.16 (d, *J* = 6.4 Hz, 1H), 5.04 (s, 1H), 4.28-4.20 (m, 2H), 3.98 (d, *J* = 6.8 Hz, 1H), 3.64 (t, *J* = 7.2 Hz, 2H), 2.78 (t, *J* = 7.6 Hz, 2H), 2.12-2.02 (m, 3H), 1.95 (t, *J* = 5.2 Hz, 1H), 1.67-1.63 (m, 1H), 1.28 (t, *J* = 7.2 Hz, 3H). HRMS calculated for C<sub>32</sub>H<sub>33</sub>N<sub>4</sub>O<sub>4</sub> (M + H)<sup>+</sup>: 537.2502; found 537.2496.

**Ethyl (1S,2R,3S,4R,5S)-4-(2-((5-chlorothiophen-2-yl)ethynyl)-4-((3-phenylpropyl)amino)-7H-pyrrolo[2,3-d]pyrimidin-7-yl)-2,3-dihydroxybicyclo[3.1.0]hexane-1-carboxylate (62)**

Compound **62** (91%) was prepared from compound **74** following the same method as for compound **61**. <sup>1</sup>H NMR (CD<sub>3</sub>OD, 400 MHz)  $\delta$  7.25 (d, *J* = 4.0 Hz, 1H), 7.18-7.14 (m, 5H), 7.04-7.02 (m, 2H), 6.65 (d, *J* = 3.2 Hz, 1H), 5.12 (d, *J* = 6.8 Hz, 1H), 5.02 (s, 1H), 4.31-4.21 (m, 2H), 3.92 (d, *J* = 6.4 Hz, 1H), 3.60 (t, *J* = 7.2 Hz, 2H), 2.75 (t, *J* = 7.6 Hz, 2H), 2.11-2.06 (m, 1H), 2.00 (t, *J* = 7.6 Hz, 2H), 1.97 (t, *J* = 4.8 Hz, 1H), 1.66-1.62 (m, 1H), 1.30 (t, *J* = 7.2 Hz, 3H). HRMS calculated for C<sub>30</sub>H<sub>30</sub>N<sub>4</sub>O<sub>4</sub>SCl (M + H)<sup>+</sup>: 577.1676; found 577.1683.

**Ethyl (1S,2R,3S,4R,5S)-2,3-dihydroxy-4-(4-((3-(3-hydroxy-4-methoxyphenyl)propyl)amino)-2-(phenylethynyl)-7H-pyrrolo[2,3-d]pyrimidin-7-yl)bicyclo[3.1.0]hexane-1-carboxylate (63)**

Compound **63** (88%) was prepared from compound **74** following the same method as for compound **61**. <sup>1</sup>H NMR (CD<sub>3</sub>OD, 400 MHz)  $\delta$  7.68-7.66 (m, 2H), 7.44-7.43 (m, 3H), 7.01 (d, *J* = 3.6 Hz, 1H), 6.82 (d, *J* = 8.0 Hz, 1H), 6.70-6.67 (m, 2H), 6.63 (d, *J* = 3.6 Hz, 1H), 5.12 (d, *J* = 6.4 Hz, 1H), 5.05 (s, 1H), 4.29-4.21 (m, 2H), 3.92 (d, *J* = 6.4 Hz, 1H), 3.80 (s, 3H), 3.61 (d, *J* = 7.2 Hz, 2H), 2.64 (t, *J* = 7.6 Hz, 2H), 2.11-2.08 (m, 1H), 2.02-1.94 (m, 3H), 1.66-1.63 (m, 1H), 1.30 (t, *J* = 7.2 Hz, 3H). HRMS calculated for C<sub>33</sub>H<sub>35</sub>N<sub>4</sub>O<sub>6</sub> (M + H)<sup>+</sup>: 583.2557; found 583.2567.

**Ethyl (1S,2R,3S,4R,5S)-4-(2-((5-chlorothiophen-2-yl)ethynyl)-4-((3-(3-hydroxy-4-methoxyphenyl)propyl)amino)-7H-pyrrolo[2,3-d]pyrimidin-7-yl)-2,3-dihydroxybicyclo[3.1.0]hexane-1-carboxylate (64)**

Compound **64** (89%) was prepared from compound **74** following the same method as for compound **61**. <sup>1</sup>H NMR (CD<sub>3</sub>OD, 400 MHz)  $\delta$  7.31 (d, *J* = 4.0 Hz, 1H), 7.2 (d, *J* = 4.0 Hz, 2H), 6.80 (d, *J* = 8.0 Hz, 1H), 6.70-6.66 (m, 2H), 6.62 (d, *J* = 3.2 Hz, 1H), 5.12 (d, *J* = 6.4 Hz, 1H), 5.02 (s, 1H), 4.31-4.21 (m, 2H), 3.91 (d, *J* = 6.4 Hz, 1H), 3.81 (s, 3H), 3.57 (t, *J* = 7.2 Hz, 2H), 2.63 (t, *J* = 7.6 Hz, 2H), 2.10-2.07 (m, 1H), 1.98-1.95 (m, 3H), 1.65-1.62 (m, 1H), 1.30 (t, *J* = 7.2 Hz, 3H). HRMS calculated for C<sub>31</sub>H<sub>32</sub>N<sub>4</sub>O<sub>6</sub>SCl (M + H)<sup>+</sup>: 623.1731; found 623.1736.

**N-(3-Azidobenzyl)-9-((3aR,3bR,4aS,5R,5aS)-3b-(((tert-butyl)diphenylsilyl)oxy)methyl)-2,2-dimethylhexahydrocyclopropa[3,4]cyclopenta[1,2-d][1,3]dioxol-5-yl)-2-iodo-9H-purin-6-amine (67)**

3-Azido-benzylamine (440 mg, 5.70 mmol) and DIPEA (2.5 mL, 14.2 mmol) was added to a solution of compound **66** (1 g, 0.08 mmol) in 2-propanol (12 mL) and the mixture stirred at room temperature overnight. Solvent was evaporated and the residue was purified on flash silica gel column chromatography (hexane: ethyl acetate = 1:1) to give the compound **67** (1.02 mg, 87%) as a colorless foamy solid. <sup>1</sup>H NMR (CD<sub>3</sub>OD, 400 MHz)  $\delta$  8.13 (s, 1H), 7.63-7.59 (m, 4H), 7.40-7.22 (m, 8H), 7.18 (s, 1H), 6.98 (d, *J* = 7.6 Hz, 1H), 5.28 (d, *J* = 6.8 Hz, 1H), 4.72-4.70 (m, 3H), 4.21 (d, *J* = 10.4 Hz, 1H), 3.91 (d, *J* = 10.4 Hz, 1H), 1.52-1.49 (m, 4H), 1.30 (t, *J* = 6.4 Hz, 1H), 1.25 (s, 3H), 1.05 (s, 9H), 1.02-0.99 (m, 1H). HRMS calculated for C<sub>38</sub>H<sub>42</sub>N<sub>8</sub>O<sub>3</sub>Si (M + H)<sup>+</sup>: 813.2194; found 813.2206.

**((3aR,3bR,4aS,5R,5aS)-5-(6-((3-azidobenzyl)amino)-2-iodo-9H-purin-9-yl)-2,2-dimethyltetrahydrocyclopropa[3,4]cyclopenta[1,2-d][1,3]dioxol-3b(3aH)-yl)methanol (68)**

TBAF (1.84 mL, 1M solution in THF) was added to a solution of compound **67** (1 gm, 1.23 mmol) in anhydrous THF (8 mL) and the mixture stirred for 1 h at room temperature. Solvent was evaporated and the residue was purified on flash silica gel column chromatography (hexane:ethyl acetate = 1:2) to give the alcohol derivative **68** (0.643 mg, 91%) as a syrup. <sup>1</sup>H NMR (CD<sub>3</sub>OD, 400 MHz)  $\delta$  8.13 (s, 1H), 7.35 (t, *J* = 8.0 Hz, 1H), 7.22 (d, *J* = 7.6 Hz, 1H), 7.14 (s, 1H), 6.97-6.95 (m, 1H), 5.35 (d, *J* = 7.2 Hz, 1H), 4.93 (s, 1H), 4.71 (m, 3H), 3.94 (d, *J* = 11.6 Hz, 1H), 3.76 (d, *J* = 11.6 Hz, 1H), 1.65-1.62 (m, 1H), 1.52 (s, 3H), 1.26 (s, 3H), 1.12 (t, *J* = 5.2 Hz, 1H), 0.99-0.96 (m, 1H). HRMS calculated for C<sub>22</sub>H<sub>24</sub>N<sub>8</sub>O<sub>3</sub>I (M + H)<sup>+</sup>: 575.1016; found 575.1019.

**((3aR,3bR,4aS,5R,5aS)-5-(6-((3-Azidobenzyl)amino)-2-((3,4-difluorophenyl)ethynyl)-9H-purin-9-yl)-2,2-dimethyltetrahydrocyclopropa[3,4]cyclopenta[1,2-d][1,3]dioxol-3b(3aH)-yl)methanol (69)**

PdCl<sub>2</sub>(PPh<sub>3</sub>)<sub>2</sub> (12.4 mg, 0.017 mmol), 3,4-difluoro-phenylethynyl (32  $\mu$ L, 0.26 mmol) and triethylamine (120  $\mu$ L, 0.88 mmol) were added to a solution of compound **68** (51 mg, 0.08 mmol) in anhydrous DMF (1.2 mL) and the mixture stirred at room temperature overnight. Solvent was evaporated under vacuum and the residue was purified on flash silica gel column chromatography (hexane:ethyl acetate = 1:2) to give the alkyne derivative **69** (35 mg, 68%) as a brown syrup. <sup>1</sup>H NMR (CD<sub>3</sub>OD, 400 MHz)  $\delta$  8.30 (s, 1H), 7.64-7.59 (m, 1H), 7.53-7.49 (m, 1H), 7.37-7.33 (m, 2H), 7.24-7.16 (m, 2H), 6.98 (m, 1H), 5.46 (d, *J* = 7.2 Hz, 1H), 5.02 (s, 1H), 4.84 (br s, 2H), 4.71 (d, *J* = 7.2 Hz, 1H), 4.09 (d, *J* = 7.6 Hz, 1H), 3.56 (d, *J* = 7.6 Hz, 1H), 1.78-1.75 (m, 1H), 1.53 (s, 3H), 1.26 (s, 3H), 1.17 (t, *J* = 5.2 Hz, 1H), 1.00-0.97 (m, 1H). HRMS calculated for C<sub>30</sub>H<sub>27</sub>N<sub>8</sub>O<sub>3</sub>F<sub>2</sub> (M + H)<sup>+</sup>: 585.2174; found 585.2170.

**Ethyl (3aR,3bS,4aS,5R,5aS)-5-(2-iodo-4-((3-phenylpropyl)amino)-7H-pyrrolo[2,3-d]pyrimidin-7-yl)-2,2-dimethyltetrahydrocyclopropa[3,4]cyclopenta[1,2-d][1,3]dioxole-3b(3aH)-carboxylate (71)**

3-phenyl-propyl amine (0.16 mL, 1.12 mmol) and DIPEA (0.4 mL, 2.24 mmol) was added to a solution of compound **70** (113 mg, 0.22 mmol) in 2-propanol (1.5 mL) and heated 70 °C under microwave condition for 1.5 h. Solvent was evaporated and the residue was purified on flash silica gel column chromatography (hexane: ethyl acetate = 1:1) to give the compound **71** (97 mg, 72%) as a colorless syrup. <sup>1</sup>H NMR (CD<sub>3</sub>OD, 400 MHz)  $\delta$  7.28-7.13 (m, 5H), 6.89 (d, *J* = 3.6 Hz, 1H), 6.50 (d, *J* = 2.8 Hz, 1H), 5.80 (d, *J* = 7.2 Hz, 1H), 4.86 (s, 1H), 4.74 (d, *J* = 6.8 Hz, 1H), 4.30-4.22 (m, 2H), 3.52 (t, *J* = 6.8 Hz, 2H), 2.70 (t, *J* = 6.4 Hz, 2H), 2.18-2.15 (m, 1H), 2.02-1.93 (m, 2H), 1.63-1.60 (m, 1H), 1.52-1.47 (m, 4H), 1.32 (t, *J* = 7.2 Hz, 3H), 1.27 (s, 3H). HRMS calculated for C<sub>27</sub>H<sub>32</sub>N<sub>4</sub>O<sub>4</sub>I (M + H)<sup>+</sup>: 603.1468; found 603.1458.

**Ethyl (3aR,3bS,4aS,5R,5aS)-5-(4-((3-(3-hydroxy-4-methoxyphenyl)propyl)amino)-2-iodo-7H-pyrrolo[2,3-d]pyrimidin-7-yl)-2,2-dimethyltetrahydrocyclopropa[3,4]cyclopenta[1,2-d][1,3]dioxole-3b(3aH)-carboxylate (72)**

Compound **72** (69%) was prepared from compound **65** following the same method as for compound **70**. <sup>1</sup>H NMR (CD<sub>3</sub>OD, 400 MHz)  $\delta$  6.88 (d, *J* = 3.6 Hz, 1H), 6.82-6.80 (m, 2H), 6.68-6.64 (m, 2H), 5.80 (d, *J* = 7.2 Hz, 1H), 4.86 (s, 1H), 4.74 (d, *J* = 7.2 Hz, 1H), 4.29-4.22 (m, 2H), 3.81 (s, 3H), 3.49 (t, *J* = 7.2 Hz, 2H), 2.58 (t, *J* = 7.2 Hz, 2H), 2.18-2.15 (m, 1H), 1.63-1.59 (m, 1H), 1.51-1.47 (m, 4H), 1.32 (t, *J* = 7.2 Hz, 3H), 1.26 (s, 3H). HRMS calculated for C<sub>28</sub>H<sub>34</sub>N<sub>4</sub>O<sub>4</sub>I (M + H)<sup>+</sup>: 649.1523; found 649.1513.

**Ethyl (3aR,3bS,4aS,5R,5aS)-2,2-dimethyl-5-(2-(phenylethynyl)-4-((3-phenylpropyl)amino)-7H-pyrrolo[2,3-d]pyrimidin-7-yl)tetrahydrocyclopropa[3,4]cyclopenta[1,2-d][1,3]dioxole-3b(3aH)-carboxylate (73)**

PdCl<sub>2</sub>(PPh<sub>3</sub>)<sub>2</sub> (10.5 mg, 0.014 mmol), CuI (1.4 mg, 0.007 mmol), phenylethynyl (0.05 mL, 0.44 mmol) and triethylamine (0.1 mL, 0.63 mmol) were added to a solution of compound **71** (45 mg, 0.074 mmol) in anhydrous DMF (1.2 mL) and the mixture stirred at room temperature overnight. Solvent was evaporated under vacuum and the residue was purified on flash silica gel column chromatography (hexane:ethyl acetate = 1:2) to give the phenyl alkyne derivative **73** (30 mg, 72%) as a colorless syrup. <sup>1</sup>H NMR (CD<sub>3</sub>OD, 400 MHz)  $\delta$  7.72-7.70 (m, 2H), 7.44-7.43 (m, 3H), 7.23-7.24 (m, 4H), 7.17-7.13 (m, 1H), 7.07 (d, *J* = 3.6 Hz, 1H), 6.63 (d, *J* = 3.2 Hz, 1H), 5.85 (d, *J* = 7.2 Hz, 1H), 5.07 (s, 1H), 4.73 (d, *J* = 6.8 Hz, 1H), 4.26-4.12 (m, 1H), 3.61 (t, *J* = 7.2 Hz, 2H), 2.75 (t, *J* = 7.6 Hz, 2H), 2.25-2.21 (m, 1H), 2.05-1.98 (m, 2H), 1.76-1.67 (m, 1H), 1.57-1.53 (m, 4H), 1.23 (s, 3H), 1.21 (t, *J* = 7.2 Hz, 3H). HRMS calculated for C<sub>35</sub>H<sub>37</sub>N<sub>4</sub>O<sub>4</sub> (M + H)<sup>+</sup>: 577.2815; found 577.2805.

**Ethyl (3aR,3bS,4aS,5R,5aS)-5-(2-((5-chlorothiophen-2-yl)ethynyl)-4-((3-phenylpropyl) amino)-7H-pyrrolo[2,3-d]pyrimidin-7-yl)-2,2-dimethyltetrahydrocyclopropa[3,4] cyclopenta[1,2-d][1,3]dioxole-3b(3aH)-carboxylate (74)**

Compound **74** (69%) was prepared from compound **71** following the same method as for compound **73**. <sup>1</sup>H NMR (CD<sub>3</sub>OD, 400 MHz)  $\delta$  7.35 (d, *J* = 4.4 Hz, 1H), 7.26-7.24 (m, 4H), 7.16-7.13 (m, 1H), 7.08 (d, *J* = 3.6 Hz, 1H), 7.01 (d, *J* = 4.4 Hz, 1H), 6.62 (d, *J* = 3.2 Hz, 1H), 5.83 (d, *J* = 6.8 Hz, 1H), 5.04 (s, 1H), 4.72 (d, *J* = 7.2 Hz, 1H), 4.25-4.15 (m, 2H), 3.59 (d, *J* = 7.2 Hz, 2H), 2.74 (t, *J* = 7.2 Hz, 2H), 2.24-2.21 (m, 1H), 2.04-1.97 (m, 2H), 1.71-1.67 (m, 1H), 1.56-1.53 (m, 4H), 1.29 (s, 3H), 1.24 (t, *J* = 7.2 Hz, 3H). HRMS calculated for C<sub>33</sub>H<sub>34</sub>N<sub>4</sub>O<sub>4</sub>Cl (M + H)<sup>+</sup>: 617.1989; found 617.1986.

**Ethyl (3aR,3bS,4aS,5R,5aS)-5-(4-((3-(3-hydroxy-4-methoxyphenyl)propyl)amino)-2-(phenylethynyl)-7H-pyrrolo[2,3-d]pyrimidin-7-yl)-2,2-dimethyltetrahydrocyclopropa[3,4]cyclopenta[1,2-d][1,3]dioxole-3b(3aH)-carboxylate (75)**

Compound **75** (67%) was prepared from compound **72** following the same method as for compound **73**. <sup>1</sup>H NMR (CD<sub>3</sub>OD, 400 MHz)  $\delta$  7.72-7.70 (m, 2H), 7.44-7.42 (m, 2H), 7.07 (d, *J* = 3.6 Hz, 1H), 6.81 (d, *J* = 8.0 Hz, 1H), 6.70-6.66 (m, 2H), 6.62 (d, *J* = 3.2 Hz, 1H), 5.84 (d, *J* = 6.8 Hz, 1H),

5.07 (s, 1H), 4.73 (d,  $J = 6.8$  Hz, 1H), 4.23-4.08 (m, 2H), 3.80 (s, 3H), 3.58 (t,  $J = 7.2$  Hz, 2H), 2.63 (t,  $J = 7.6$  Hz, 2H), 2.25-2.21 (m, 1H), 2.00-1.93 (m, 2H), 1.70-1.67 (m, 1H), 1.57-1.53 (m, 4H), 1.28 (s, 3H), 1.21 (t,  $J = 7.2$  Hz, 3H). HRMS calculated for  $C_{36}H_{39}N_4O_6$  ( $M + H$ )<sup>+</sup>: 623.2870; found 623.2875.

**Ethyl (3aR,3bS,4aS,5R,5aS)-5-(2-((5-chlorothiophen-2-yl)ethynyl)-4-((3-(3-hydroxy-4-methoxyphenyl)propyl)amino)-7H-pyrrolo[2,3-d]pyrimidin-7-yl)-2,2-dimethyltetrahydrocyclopropa[3,4]cyclopenta[1,2-d][1,3]dioxole-3b(3aH)-carboxylate (76)**

Compound **76** (68%) was prepared from compound **72** following the same method as for compound **73**. <sup>1</sup>H NMR (CD<sub>3</sub>OD, 400 MHz)  $\delta$  7.35-7.27 (m, 2H), 7.08 (d,  $J = 4.0$  Hz, 1H), 6.83 (d,  $J = 4.0$  Hz, 1H), 6.70-6.66 (m, 2H), 5.83 (d,  $J = 7.2$  Hz, 1H), 4.98 (s, 1H), 4.73 (d,  $J = 6.8$  Hz, 1H), 4.24-4.17 (m, 2H), 3.81 (s, 3H), 3.69 (t,  $J = 6.0$  Hz, 2H), 2.61 (t,  $J = 7.6$  Hz, 2H), 2.28-2.22 (m, 1H), 1.96 (t,  $J = 7.6$  Hz, 2H), 1.73-1.67 (m, 1H), 1.53 (s, 3H), 1.30-1.25 (m, 4H). HRMS calculated for  $C_{34}H_{36}N_4O_6Cl$  ( $M + H$ )<sup>+</sup>: 663.2044; found 663.2035.

**Figure S1.** The modulation of A<sub>3</sub> adenosine ligands on the ABCG2 ATPase activity. The curves of the representative ligands, compounds **16** (A), **31** (B), and **4** (C), are shown. Each experiment was performed at least three times in duplicate.

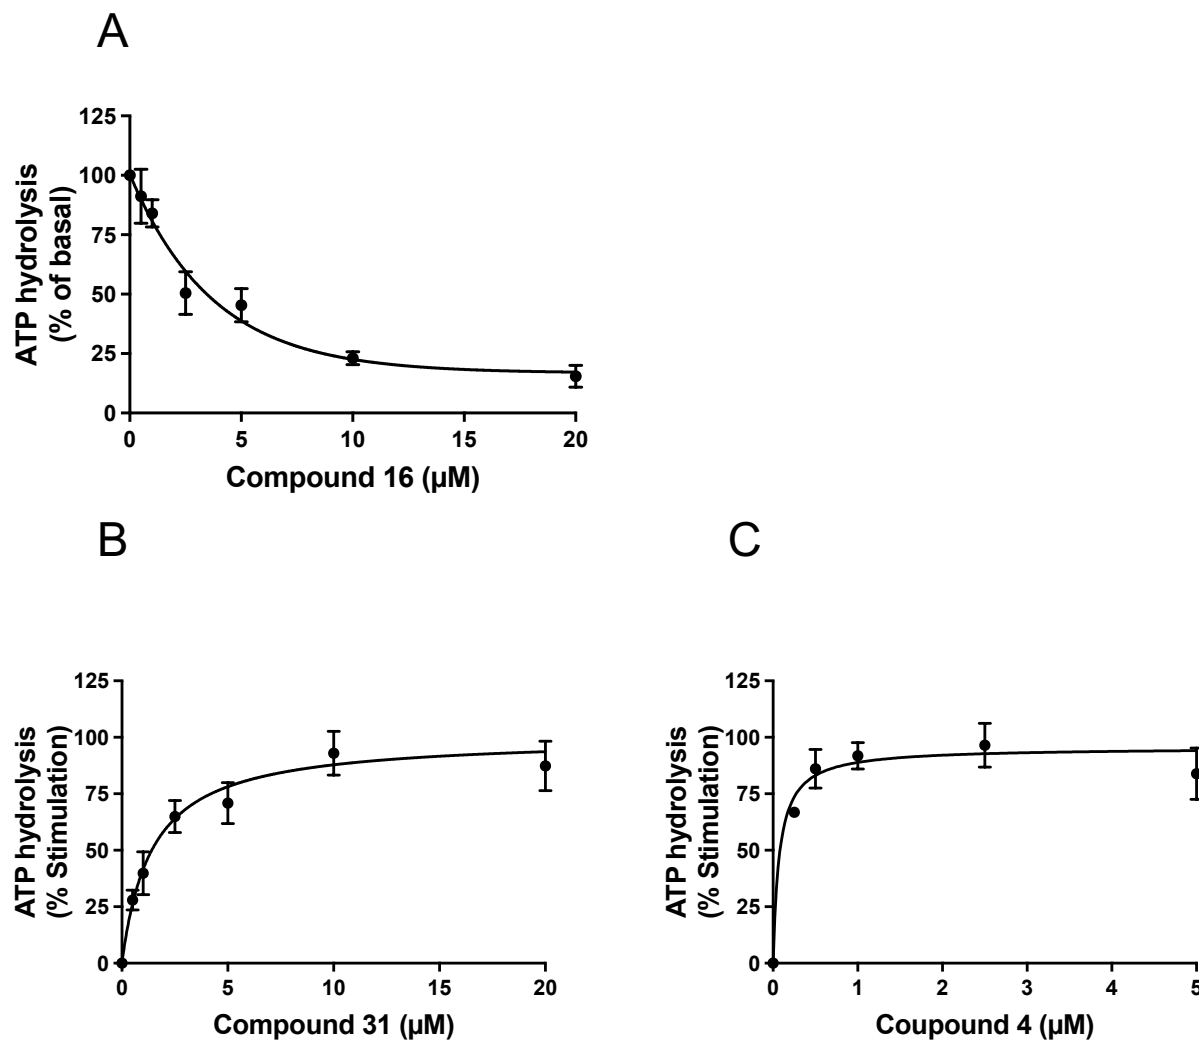

## NMR and HPLC results for representative newly prepared compounds

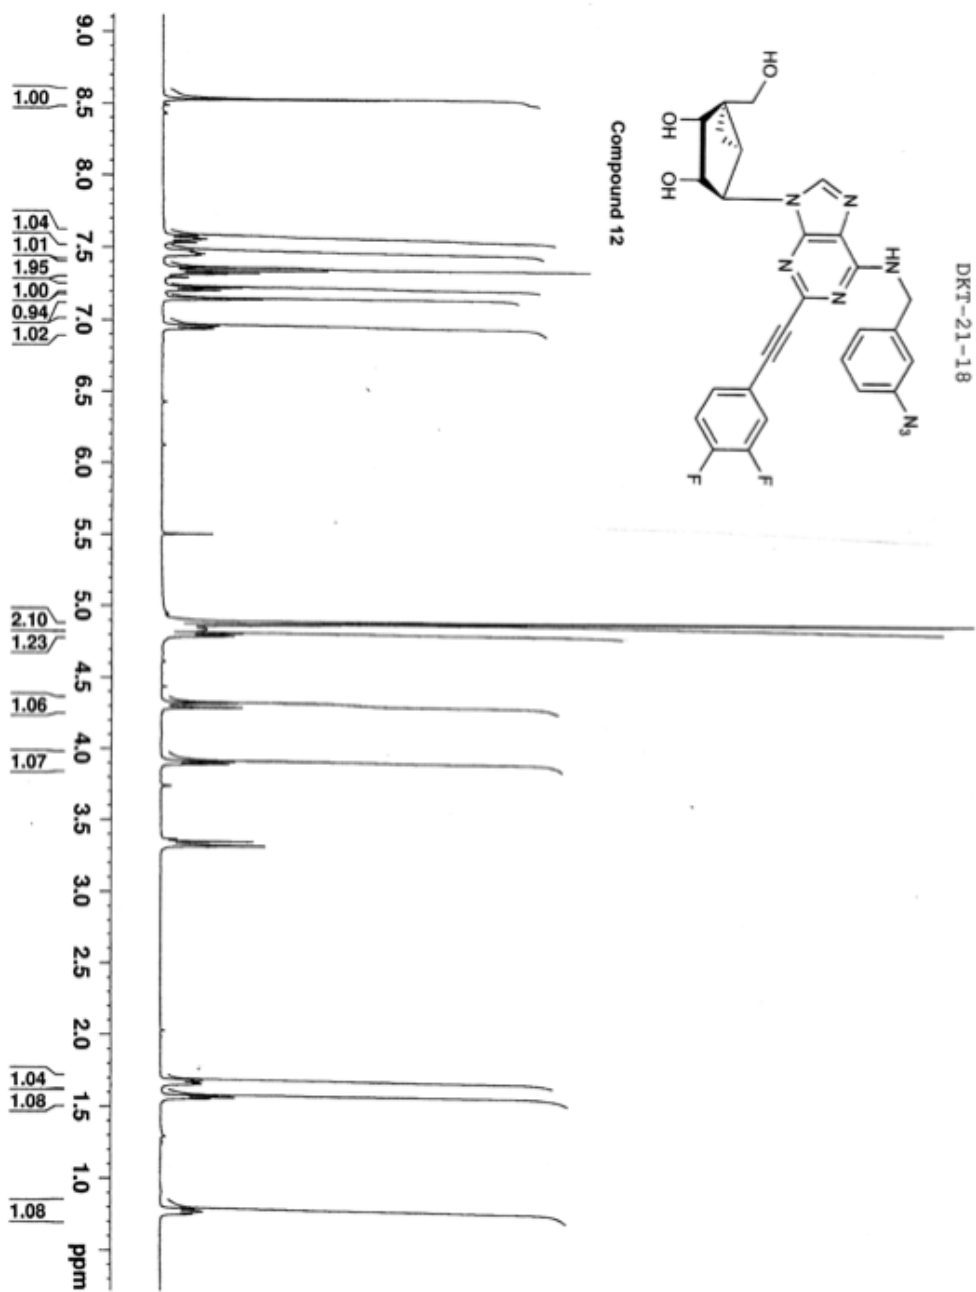



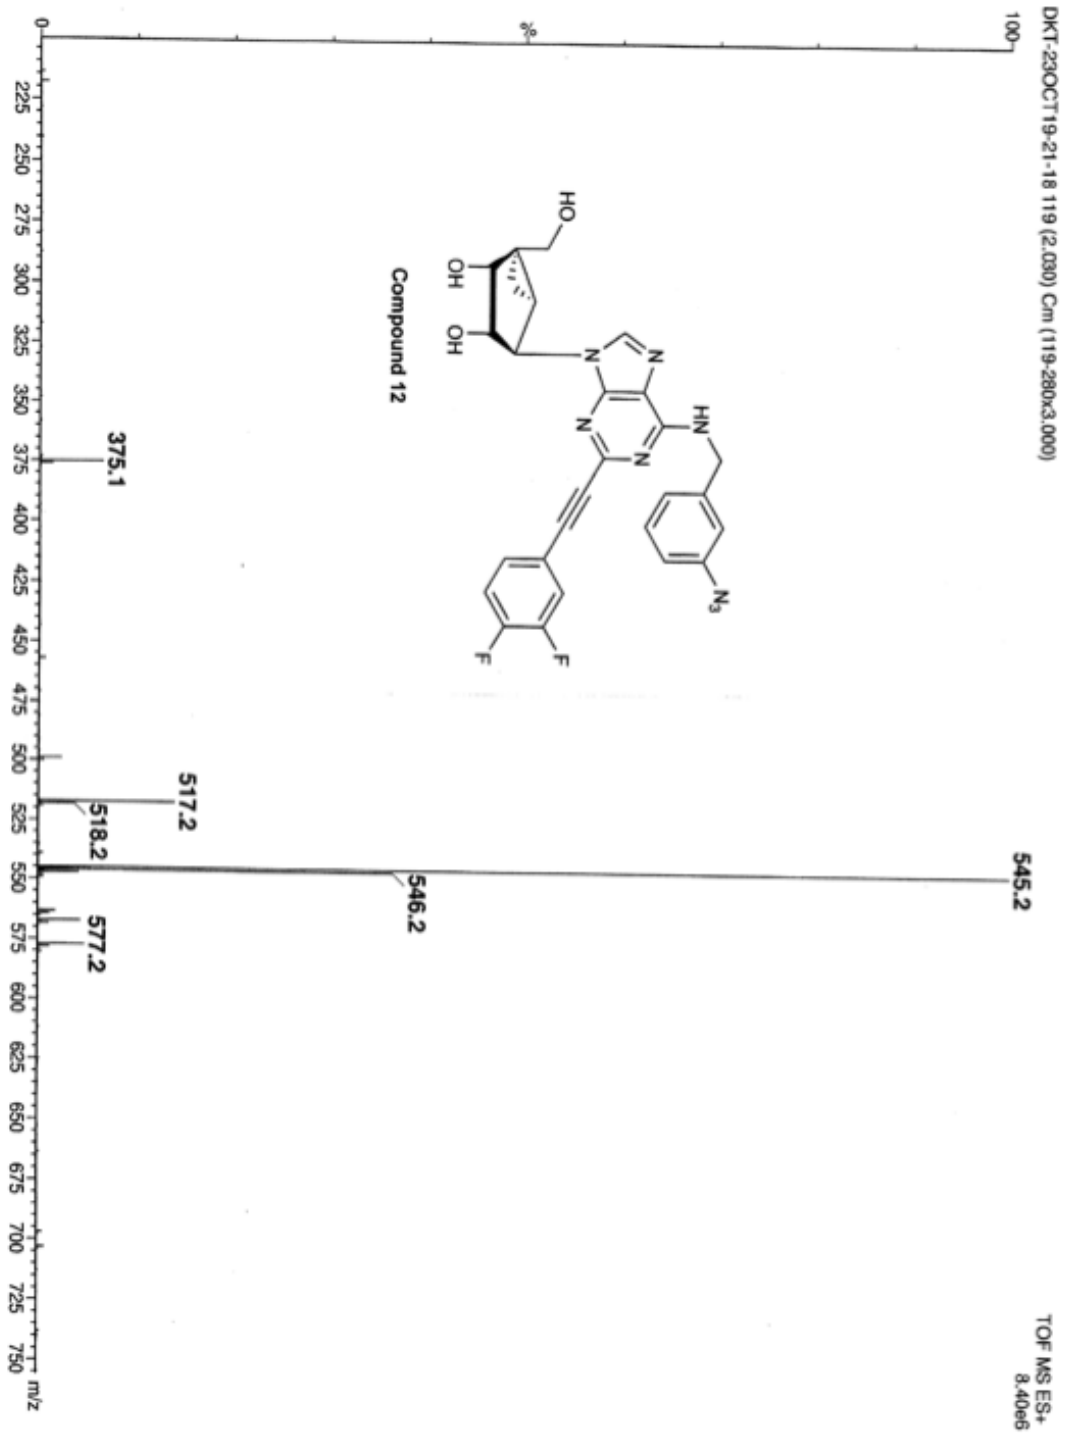

## Elemental Composition Report

Page 1

## Single Mass Analysis

Tolerance = 5.0 mDa / DBE: min = -1.5, max = 100.0

Element prediction: Off

Number of isotope peaks used for i-FIT = 3

Monoisotopic Mass, Even Electron Ions

100 formula(e) evaluated with 1 results within limits (up to 50 closest results for each mass)

Elements Used:

C: 0-100 H: 0-250 N: 8-8 O: 0-60 F: 2-2

DKT-23OCT19-21-18 277 (4.702) AM2 (Ar,25000.0,0.00,0.00); ABS

TOF MS ES+

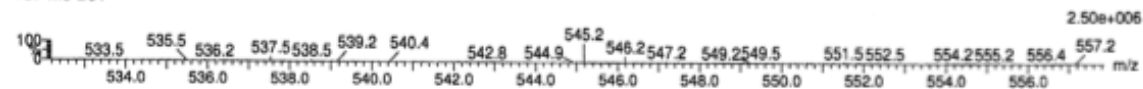

Minimum: -1.5  
 Maximum: 5.0 5.0 100.0

| Mass     | Calc. Mass | mDa | PPM | DBE  | i-FIT | Norm | Conf (%) | Formula          |
|----------|------------|-----|-----|------|-------|------|----------|------------------|
| 545.1865 | 545.1861   | 0.4 | 0.7 | 19.5 | 402.9 | n/a  | n/a      | C27 H23 N8 O3 F2 |

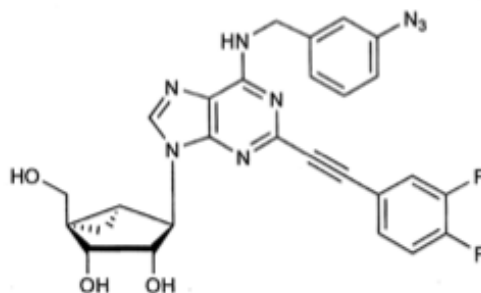

Compound 12

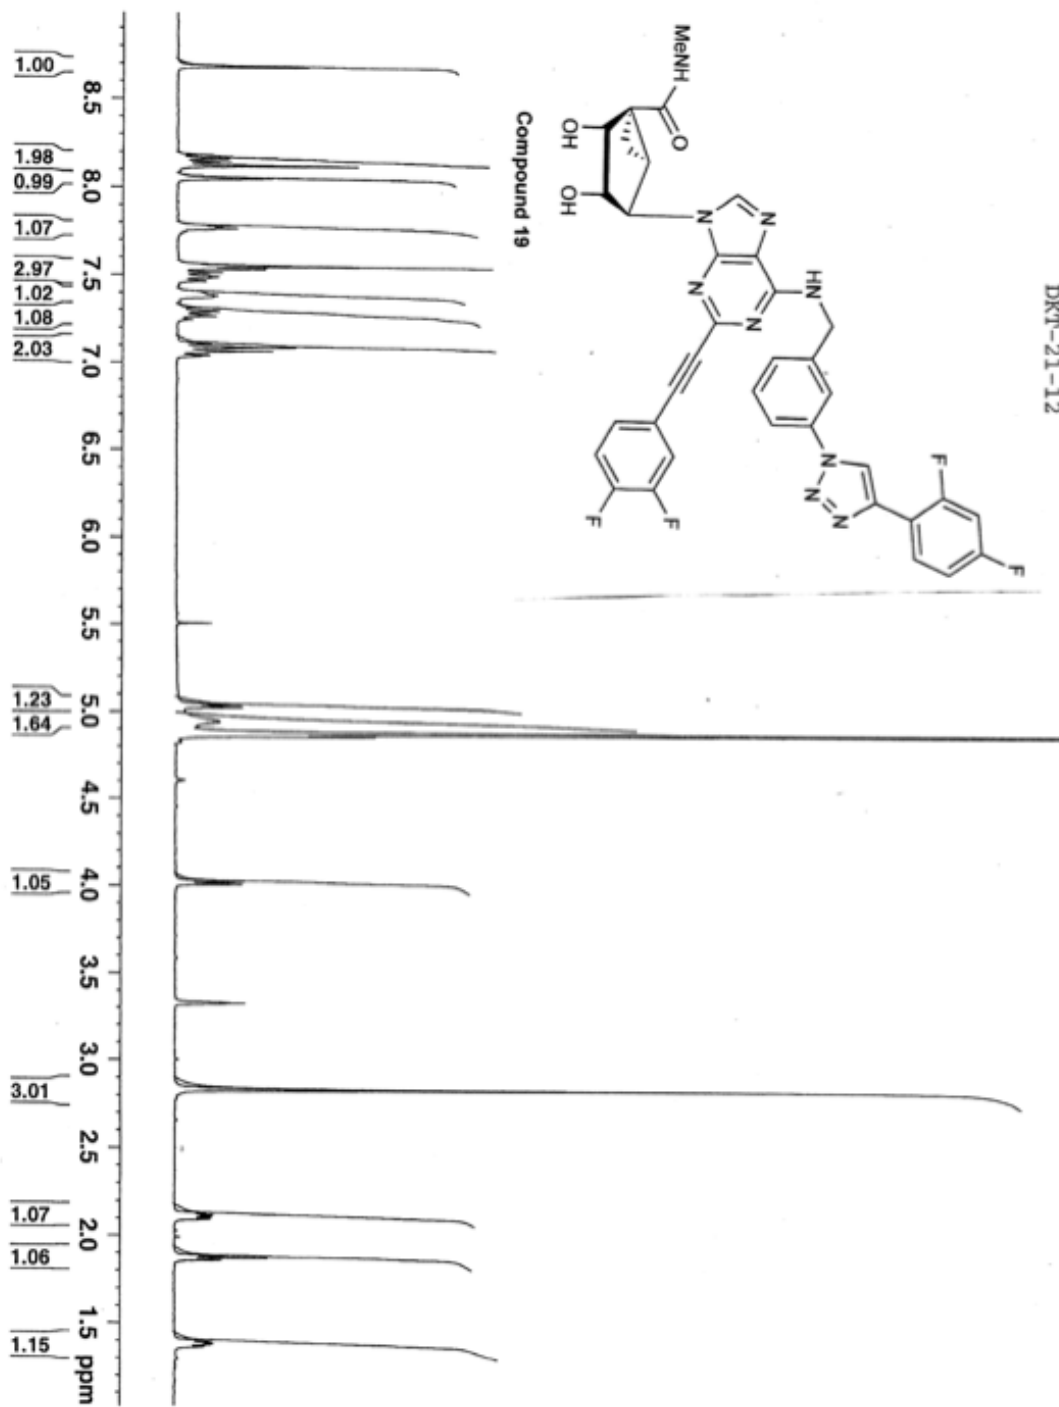

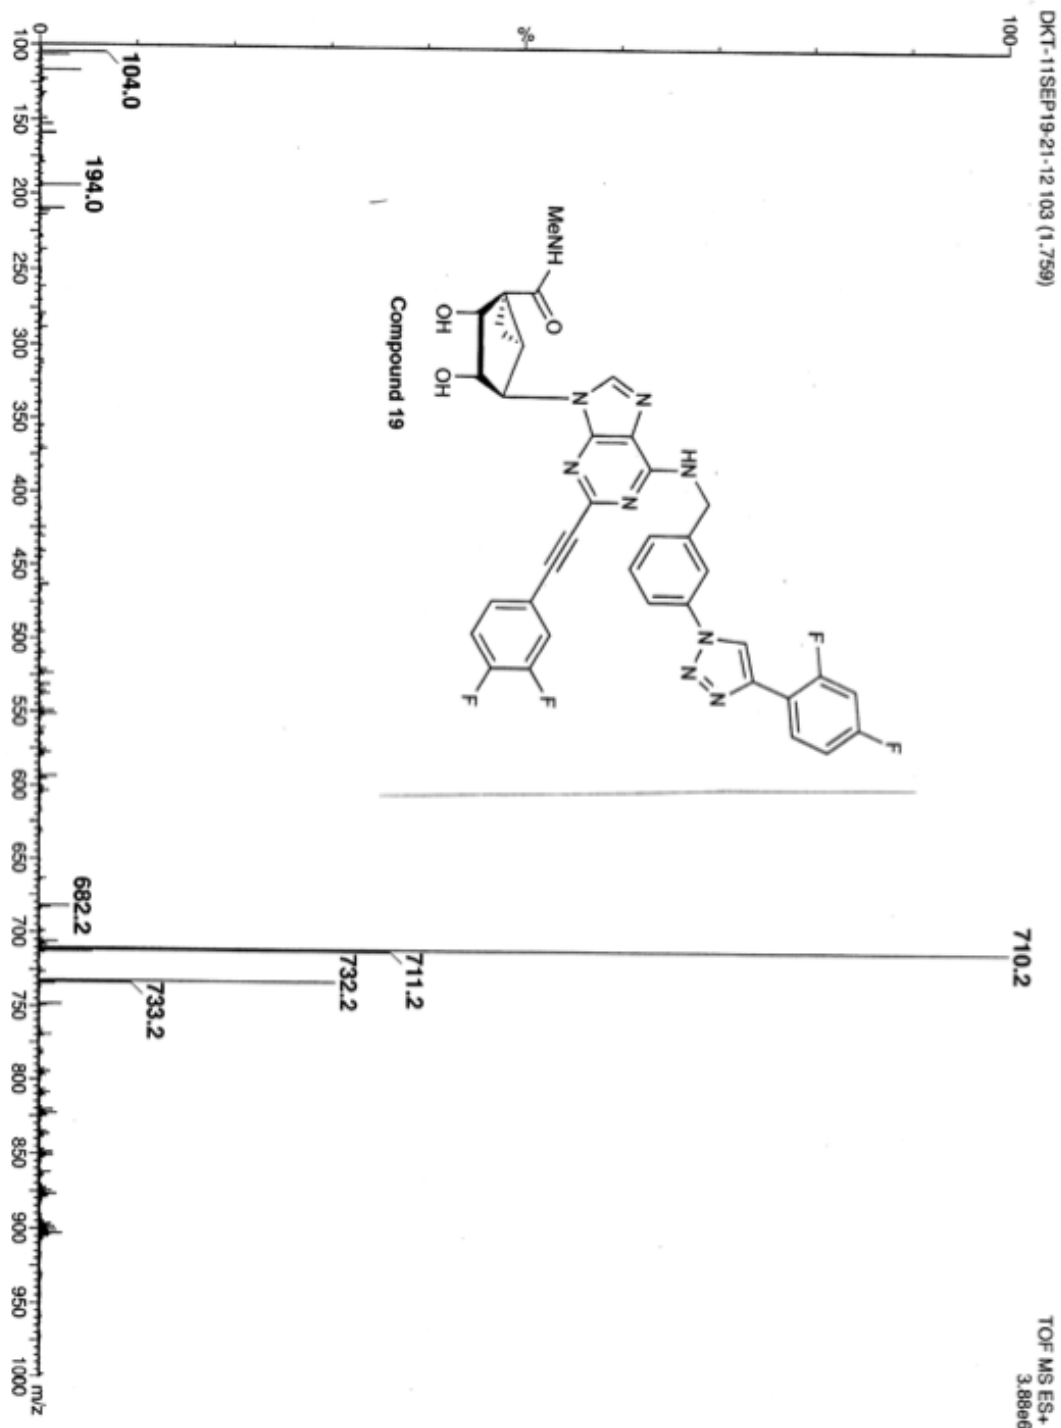

## Elemental Composition Report

Page 1

## Single Mass Analysis

Tolerance = 10.0 mDa / DBE: min = -1.5, max = 100.0

Element prediction: Off

Number of isotope peaks used for i-FIT = 3

Monoisotopic Mass, Even Electron Ions

144 formula(e) evaluated with 4 results within limits (up to 50 closest results for each mass)

Elements Used:

C: 0-100 H: 0-250 N: 9-9 O: 0-60 F: 4-4

DKT-11SEP19-21-12 106 (1.844) AM2 (Ar,25000.0,0.00,0.00); ABS

TOF MS ES+

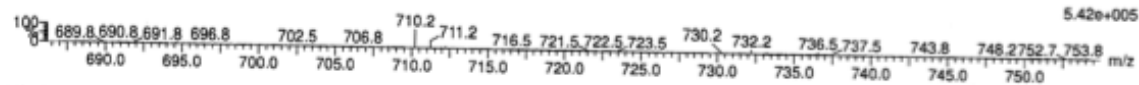

Minimum:

Maximum:

| Mass     | Calc. Mass | mDa  | PPM  | DBE  | i-FIT | Norm   | Conf(%) | Formula           |
|----------|------------|------|------|------|-------|--------|---------|-------------------|
| 710.2252 | 710.2251   | 0.1  | 0.1  | 25.5 | 350.8 | 0.001  | 99.87   | C36 H28 N9 O3 F4  |
|          | 710.2216   | 3.6  | 5.1  | 3.5  | 361.8 | 10.973 | 0.00    | C18 H36 N9 O16 F4 |
|          | 710.2310   | -5.8 | -8.2 | 16.5 | 357.6 | 6.715  | 0.12    | C29 H32 N9 O8 F4  |
|          | 710.2157   | 9.5  | 13.4 | 12.5 | 361.6 | 10.770 | 0.00    | C25 H32 N9 O11 F4 |

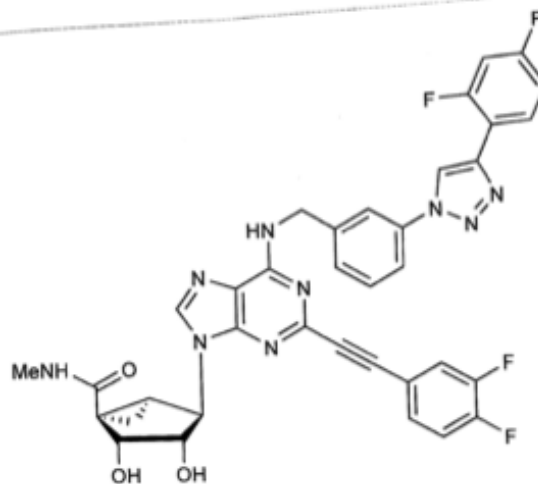

Compound 19

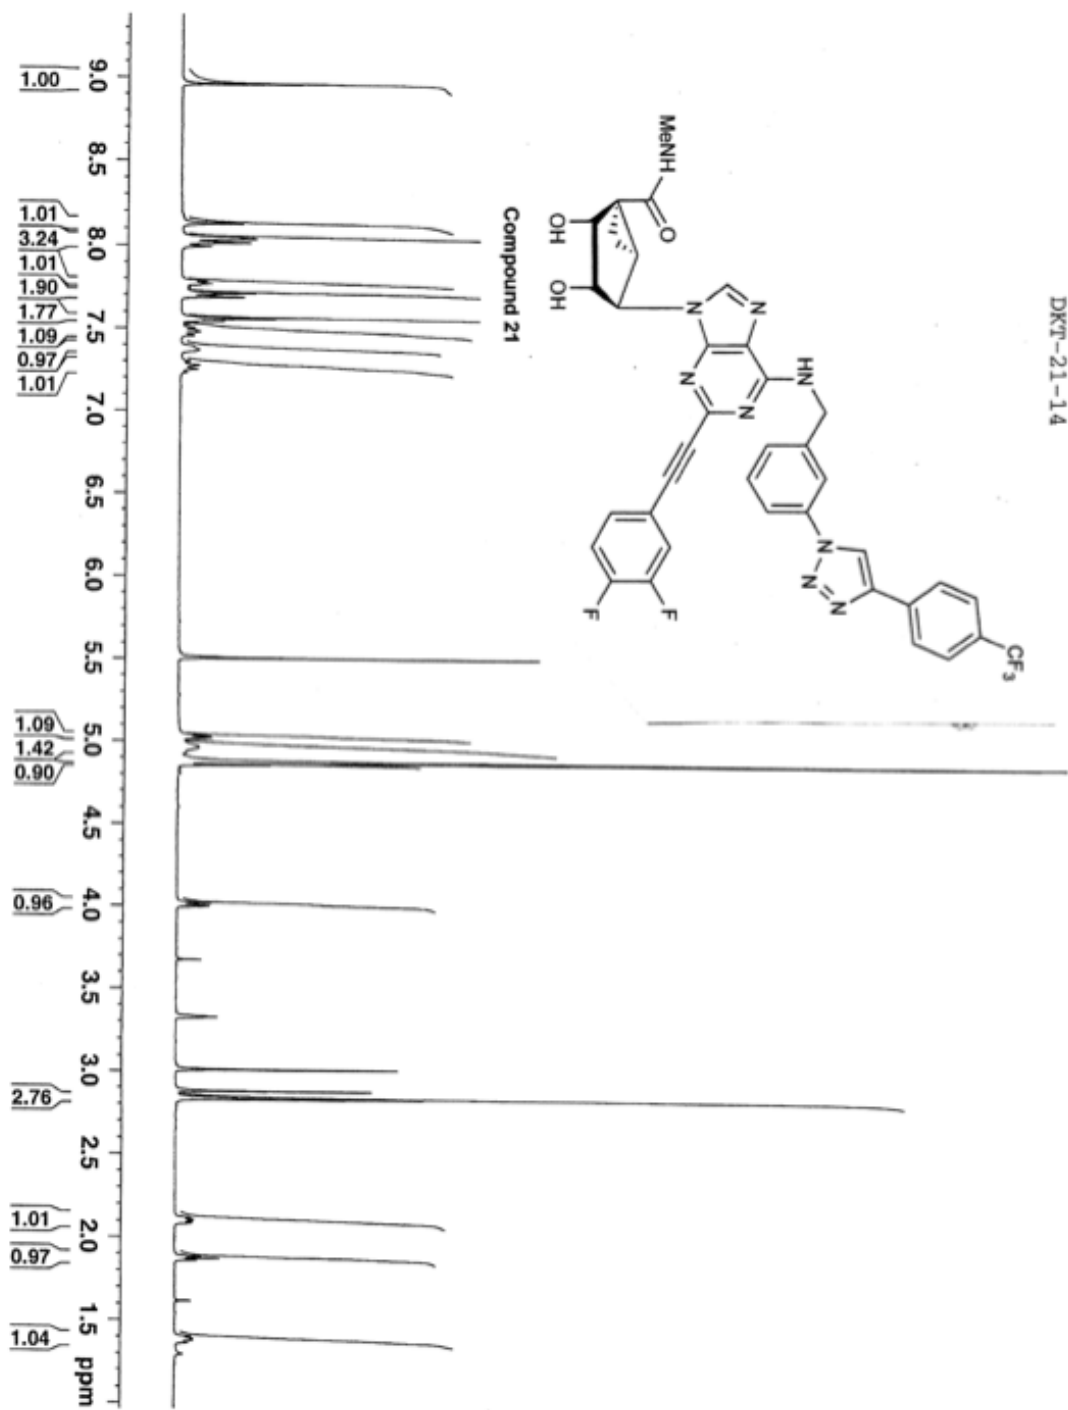

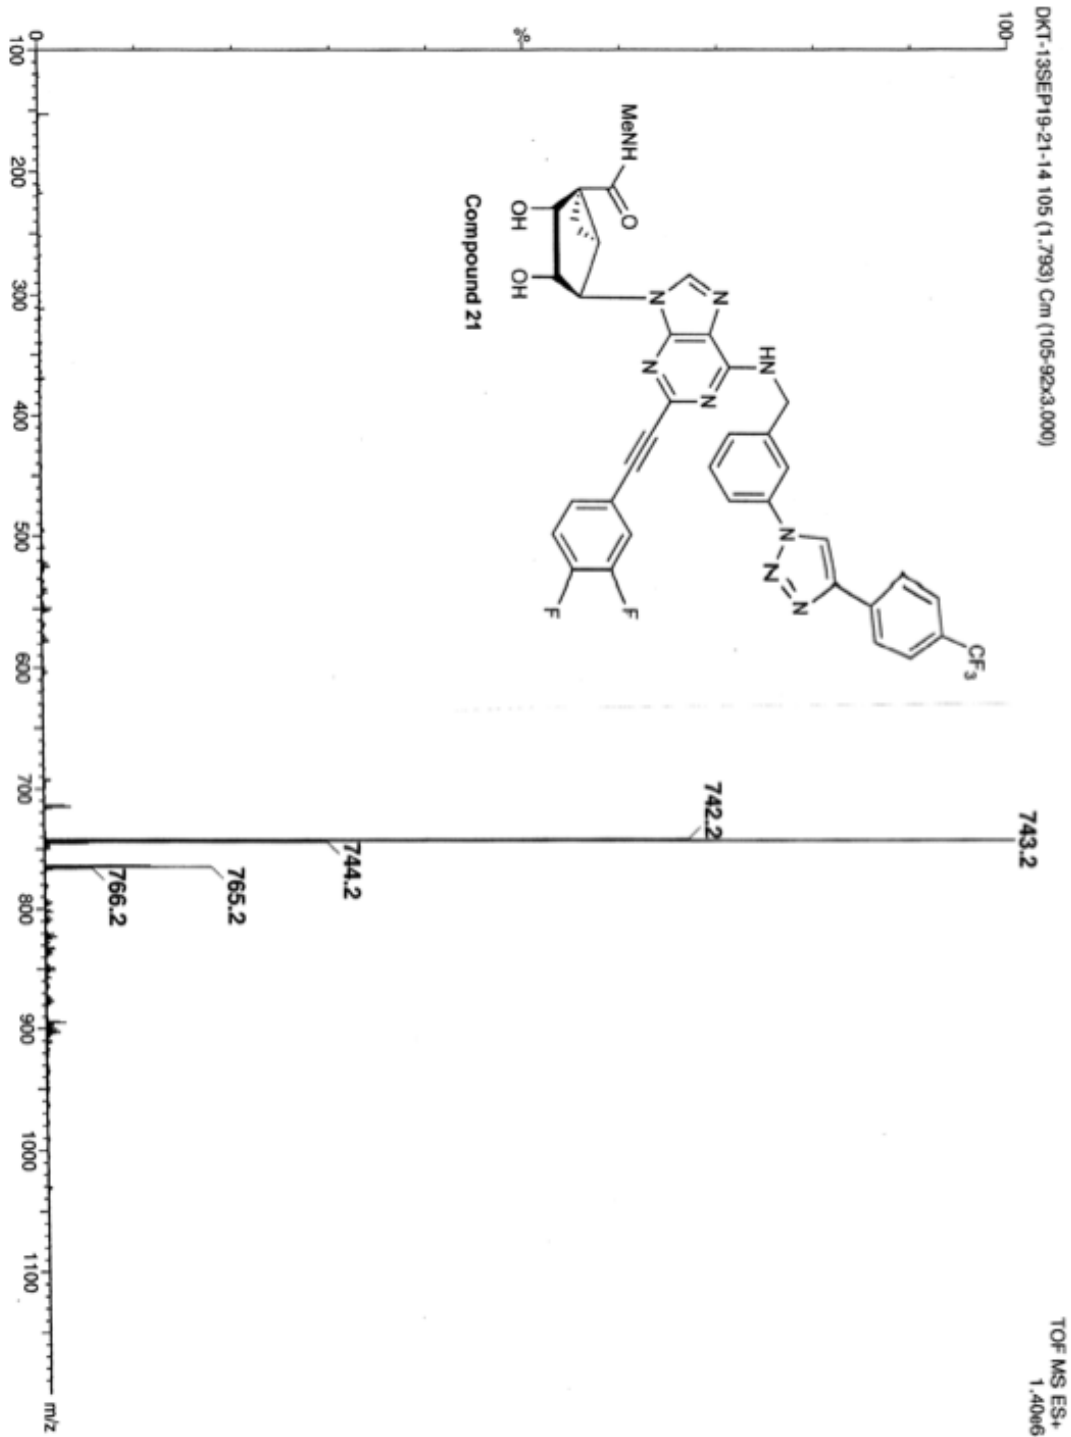

## Elemental Composition Report

Page 1

## Single Mass Analysis

Tolerance = 5.0 mDa / DBE: min = -1.5, max = 100.0

Element prediction: Off

Number of isotope peaks used for i-FIT = 3

Monoisotopic Mass, Even Electron Ions

145 formula(e) evaluated with 2 results within limits (up to 50 closest results for each mass)

Elements Used:

C: 0-100 H: 0-250 N: 9-9 O: 0-60 F: 5-5

DKT-13SEP19-21-14 106 (1.810) AM2 (Ar,25000.0,0.00,0.00); ABS

TOF MS ES+

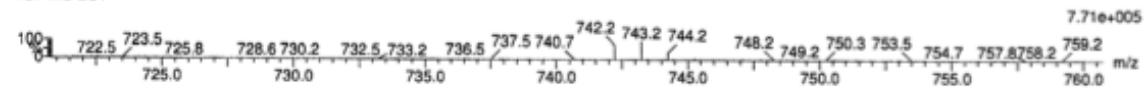

Minimum: -1.5  
Maximum: 5.0 5.0 100.0

| Mass     | Calc. Mass | mDa  | PPM  | DBE  | i-FIT | Norm  | Conf (%) | Formula           |
|----------|------------|------|------|------|-------|-------|----------|-------------------|
| 742.2305 | 742.2314   | -0.9 | -1.2 | 25.5 | 357.1 | 0.062 | 94.01    | C37 H29 N9 O3 F5  |
|          | 742.2278   | 2.7  | 3.6  | 3.5  | 359.9 | 2.815 | 5.99     | C19 H37 N9 O16 F5 |

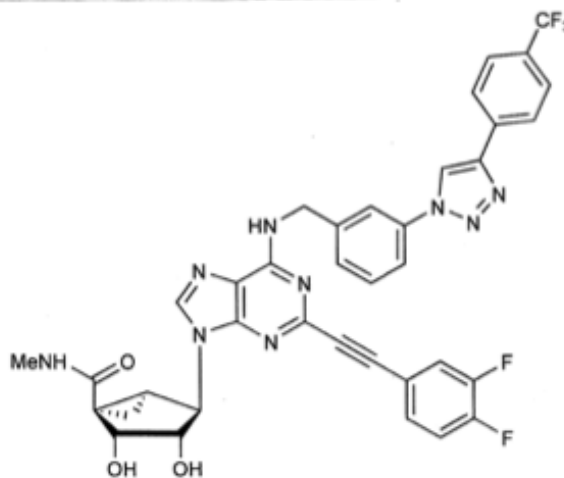

Compound 21



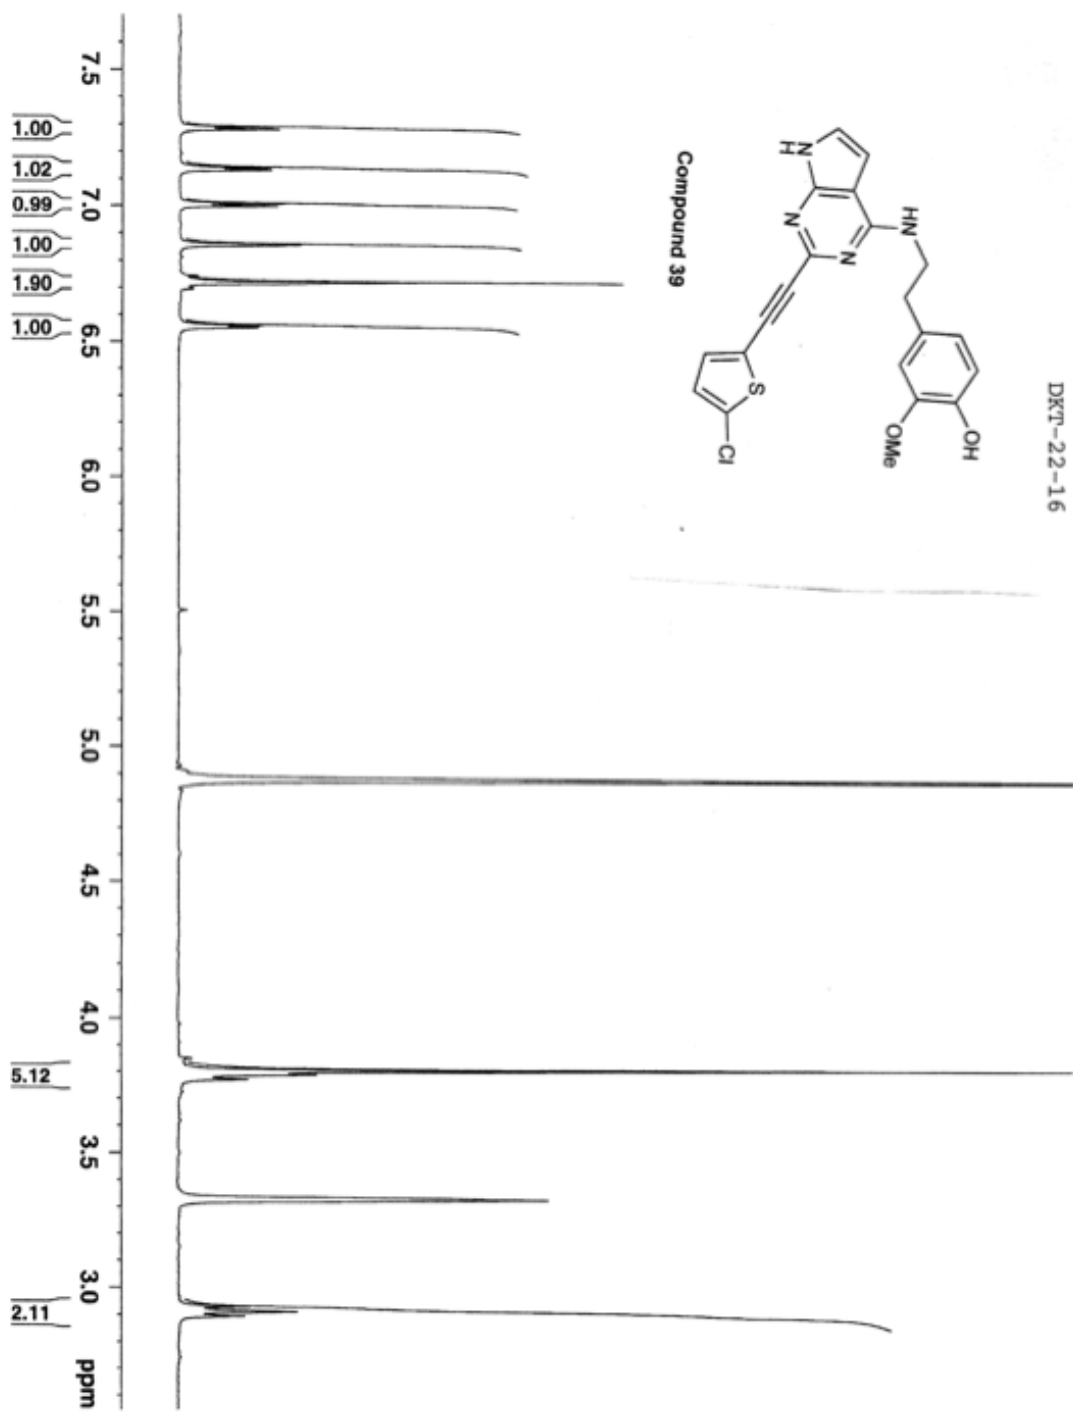

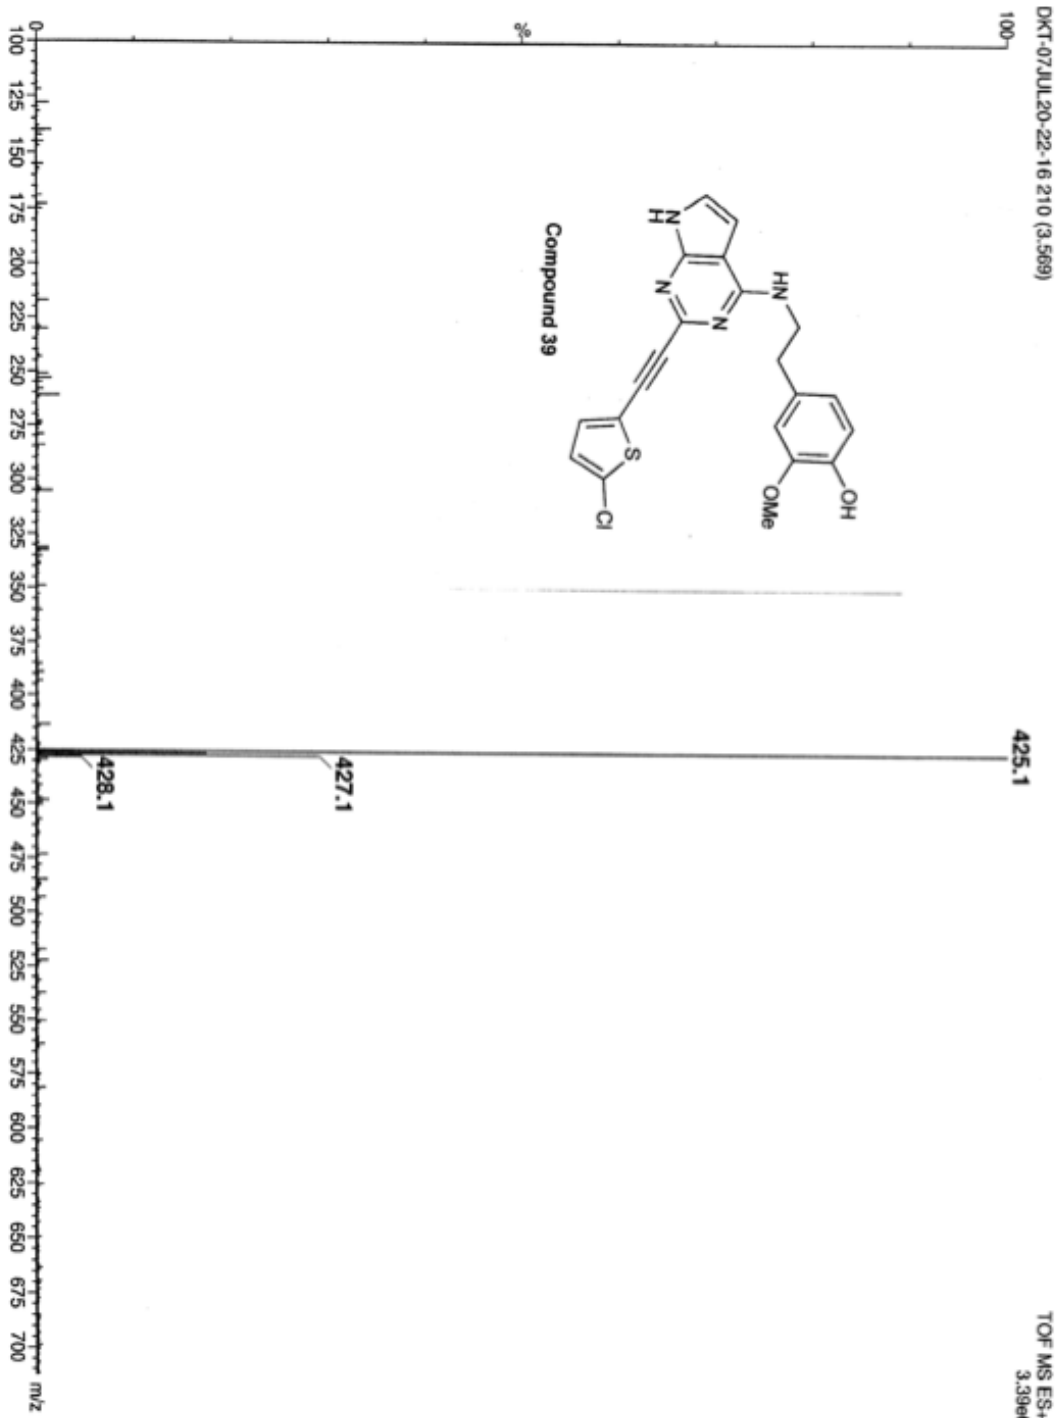

## Elemental Composition Report

Page 1

## Single Mass Analysis

Tolerance = 5.0 mDa / DBE: min = -1.5, max = 100.0

Element prediction: Off

Number of isotope peaks used for i-FIT = 3

Monoisotopic Mass, Even Electron Ions

56 formula(e) evaluated with 1 results within limits (up to 50 closest results for each mass)

Elements Used:

C: 0-100 H: 0-250 N: 4-4 O: 0-60 32S: 1-1 35Cl: 1-1

DKT-07JUL20-22-16 219 (3.721) AM2 (Ar,25000.0,0.00,0.00); ABS

TOF MS ES+

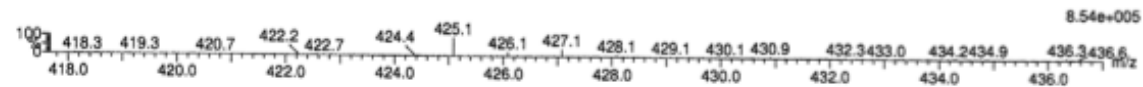

Minimum:

Maximum: 5.0 5.0 -1.5 100.0

| Mass     | Calc. Mass | mDa | PPM | DBE  | i-FIT | Norm | Conf (%) | Formula                |
|----------|------------|-----|-----|------|-------|------|----------|------------------------|
| 425.0844 | 425.0839   | 0.5 | 1.2 | 14.5 | 493.2 | n/a  | n/a      | C21 H18 N4 O2 32S 35Cl |

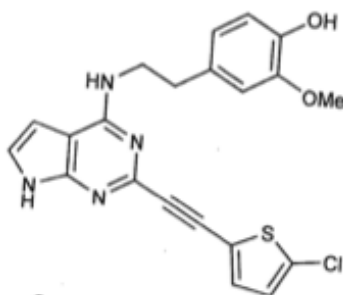

Compound 39

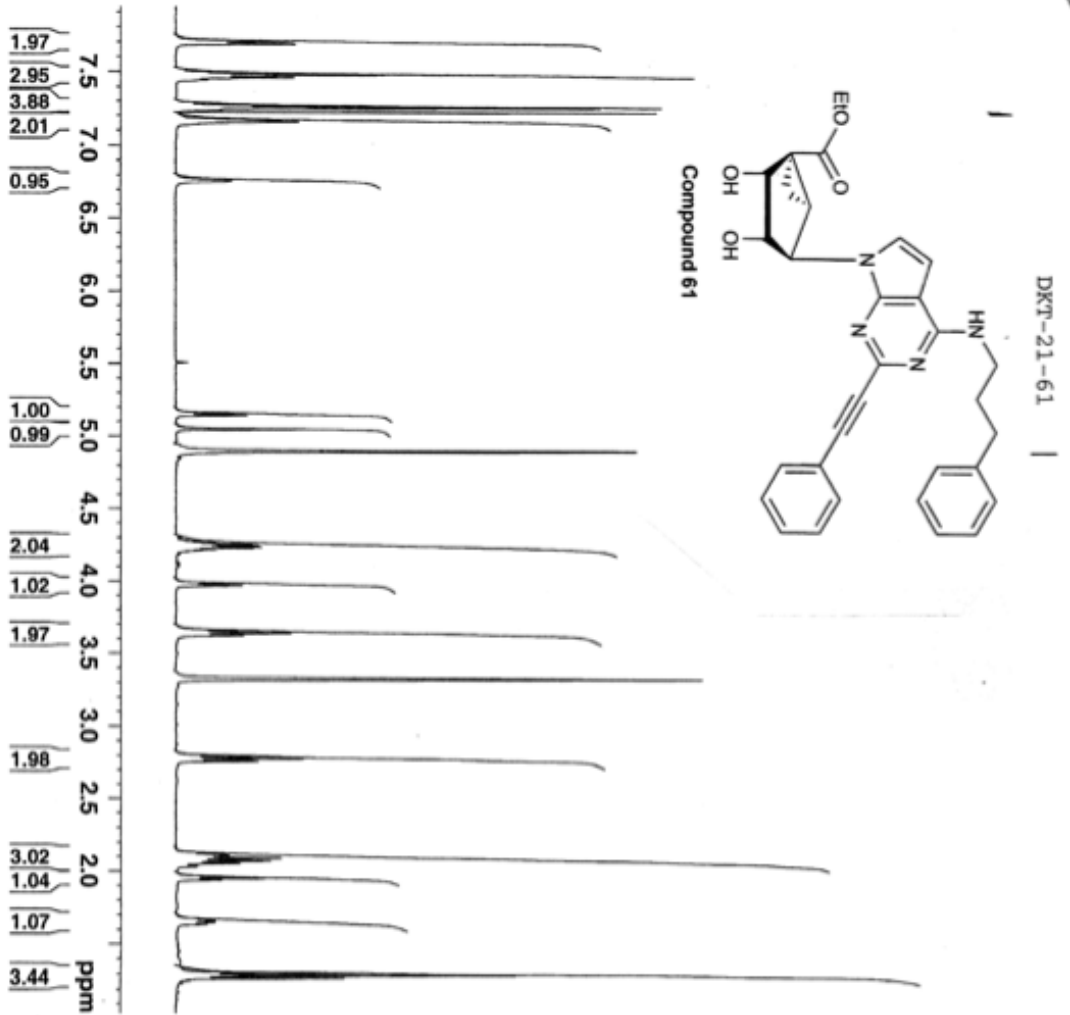

NAME DKT-21-61  
 EXPNO 1  
 PROCNO 1  
 Date\_ 20200116  
 Time 16.33  
 INSTRUM spect  
 PROBHD 5 mm PABBO BB-  
 PULPROG zg30  
 TD 65536  
 SOLVENT MeOD  
 NS 16  
 DS 0  
 SWH 8223.685 Hz  
 FIDRES 0.125483 Hz  
 AQ 3.9846387 se  
 RG 256  
 DW 60.800 use  
 DE 6.50 use  
 TE 296.2 K  
 D1 1.00000000 se  
 TD0 1  
 ===== CHANNEL f1 =====  
 NUCL1 1H  
 P1 14.00 use  
 PL1 0.00 dB  
 PL1W 11.75562859 W  
 SFO1 400.1604711 MF  
 SI 32768  
 SF 400.1580000 MF  
 WDW EM  
 SSB 0  
 LB 0.30 Hz  
 GB 0  
 PC 1.00

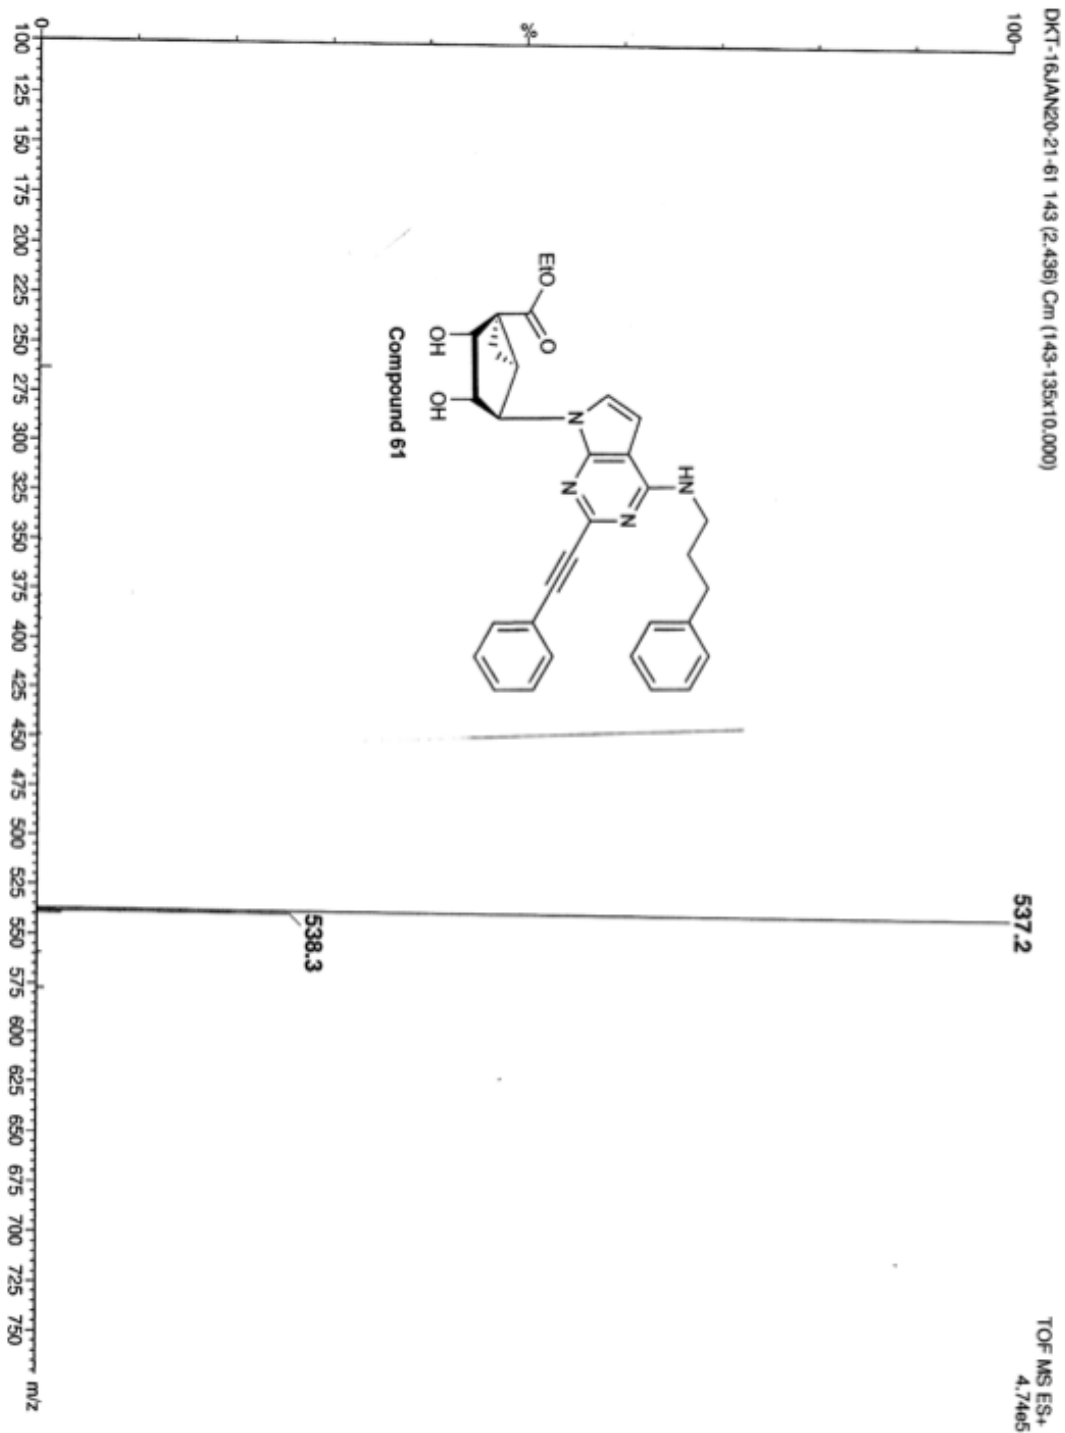

## Elemental Composition Report

Page 1

## Single Mass Analysis

Tolerance = 8.0 mDa / DBE: min = -1.5, max = 100.0

Element prediction: Off

Number of isotope peaks used for i-FIT = 3

Monoisotopic Mass, Even Electron Ions

126 formula(e) evaluated with 2 results within limits (up to 50 closest results for each mass)

Elements Used:

C: 0-100 H: 0-250 N: 4-4 O: 0-60

DKT-16JAN20-21-61 144 (2.453) AM2 (Ar.25000.0,0.00,0.00); ABS; Cm (144:145)

TOF MS ES+

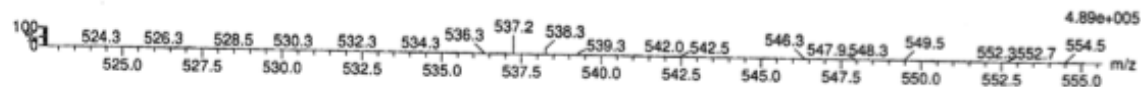

Minimum:

Maximum: 8.0 5.0 -1.5 100.0

| Mass     | Calc. Mass | mDa  | PPM   | DBE  | i-FIT | Norm  | Conf (%) | Formula       |
|----------|------------|------|-------|------|-------|-------|----------|---------------|
| 537.2496 | 537.2502   | -0.6 | -1.1  | 18.5 | 381.4 | 1.979 | 13.82    | C32 H33 N4 O4 |
|          | 537.2561   | -6.5 | -12.1 | 9.5  | 379.6 | 0.149 | 86.18    | C25 H37 N4 O9 |

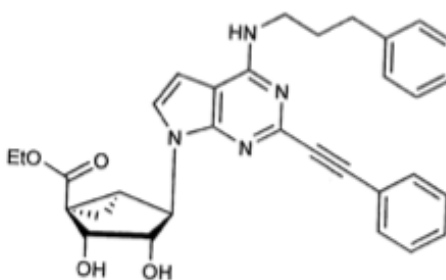

Compound 61

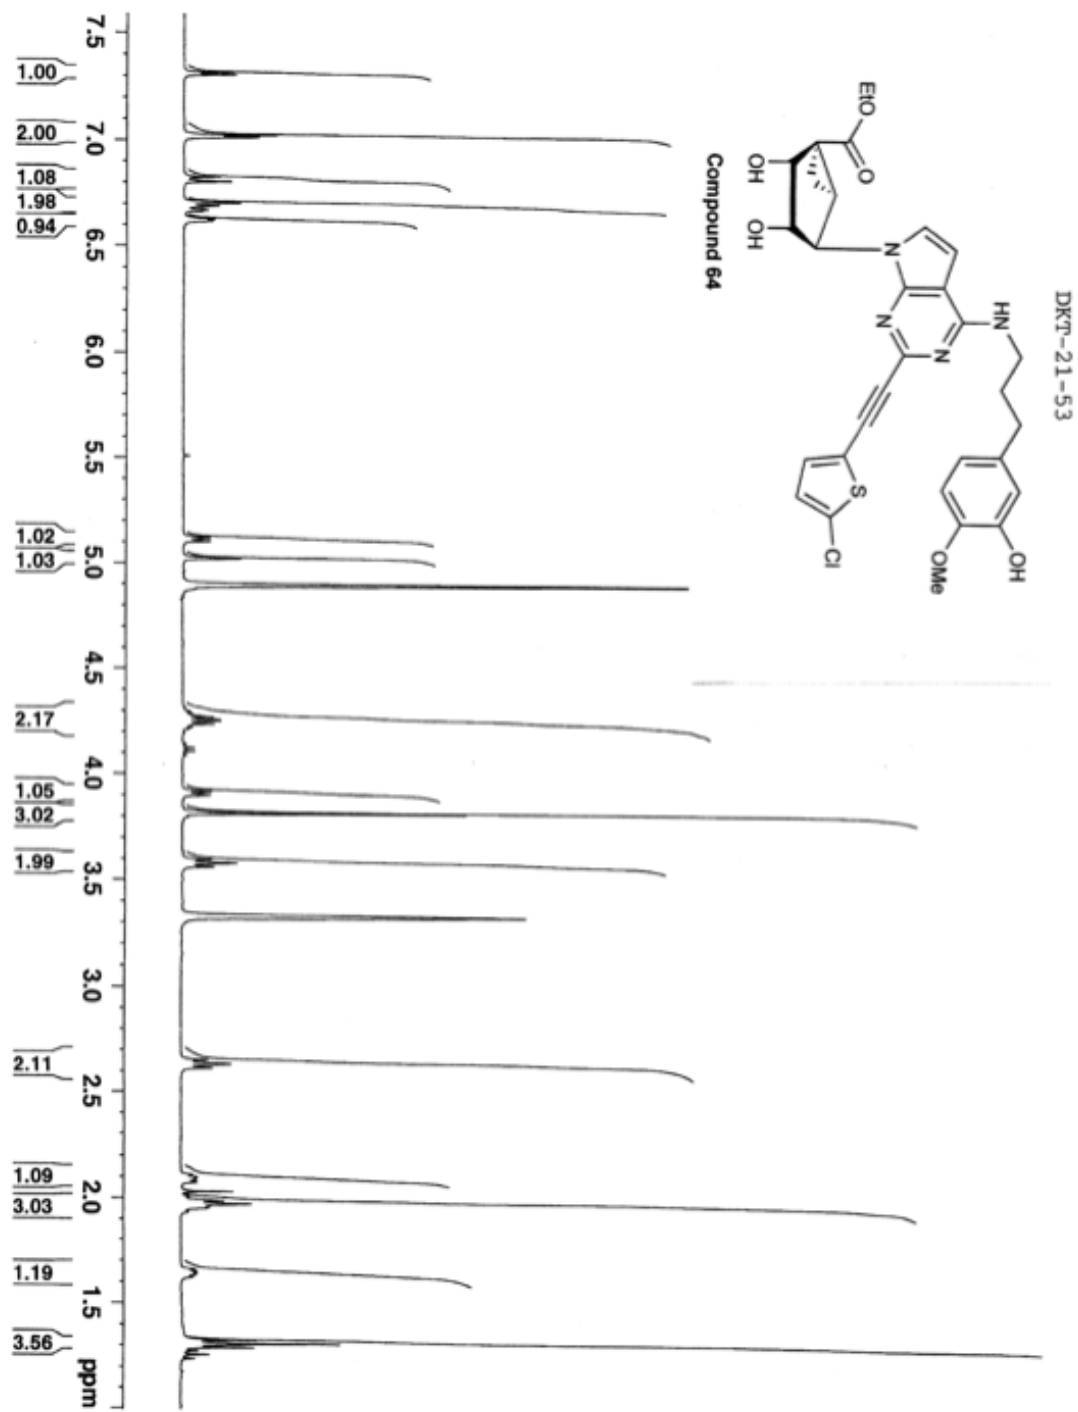

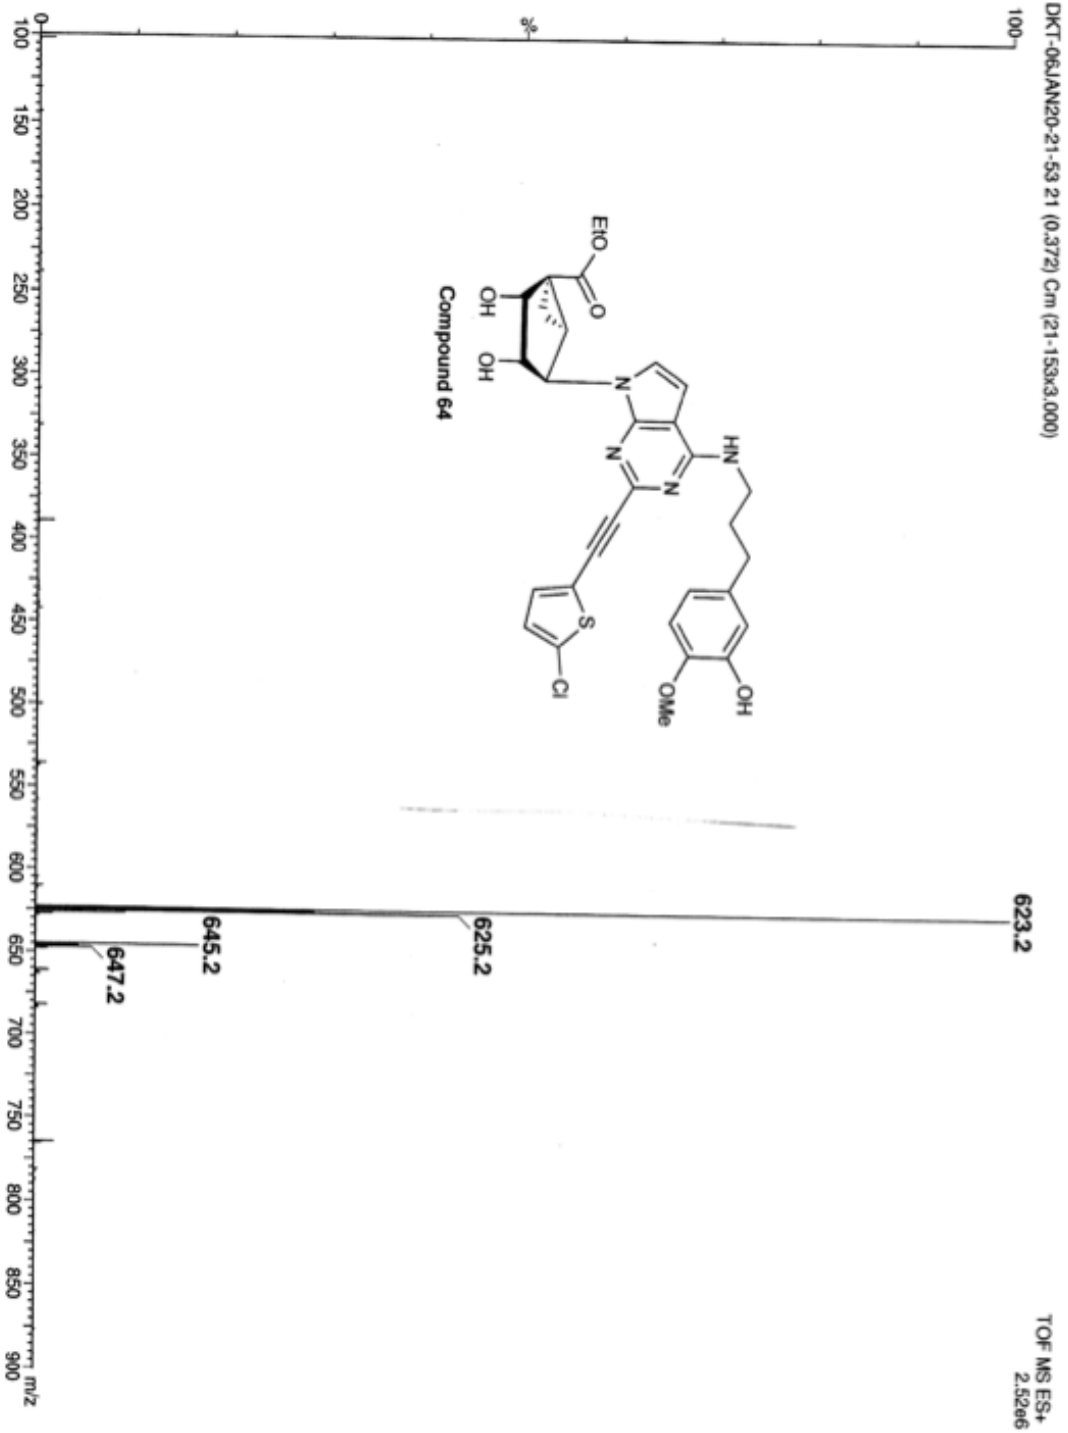



## Elemental Composition Report

Page 1

## Single Mass Analysis

Tolerance = 5.0 mDa / DBE: min = -1.5, max = 100.0

Element prediction: Off

Number of isotope peaks used for i-FIT = 3

Monoisotopic Mass, Even Electron Ions

135 formula(e) evaluated with 1 results within limits (up to 50 closest results for each mass)

Elements Used:

C: 0-100 H: 0-250 N: 4-4 O: 0-60 32S: 1-1 35Cl: 1-1

DKT-06JAN20-21-53 26 (0.457) AM2 (Ar,25000.0,0.00,0.00); ABS  
TOF MS ES+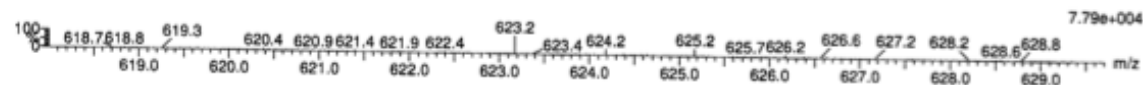

Minimum:

Maximum:

-1.5

100.0

| Mass | Calc. Mass | mDa | PPM | DBE | i-FIT | Norm | Conf(%) | Formula |
|------|------------|-----|-----|-----|-------|------|---------|---------|
|------|------------|-----|-----|-----|-------|------|---------|---------|

|          |          |     |     |      |       |     |     |                        |
|----------|----------|-----|-----|------|-------|-----|-----|------------------------|
| 623.1736 | 623.1731 | 0.5 | 0.8 | 17.5 | 348.2 | n/a | n/a | C31 H32 N4 O6 32S 35Cl |
|----------|----------|-----|-----|------|-------|-----|-----|------------------------|

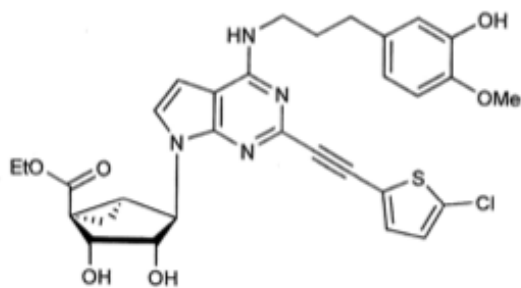

Compound 64
